# Novel artificial selection method improves function of simulated microbial communities

Björn Vessman<sup>1,\*</sup>, Pablo Guridi-Fernández<sup>1,\*</sup>, Flor Inés Arias-Sánchez<sup>2</sup>, and Sara Mitri<sup>1,3,✉</sup>

<sup>1</sup>Département de Microbiologie Fondamentale, Université de Lausanne, 1015 Lausanne, Switzerland

<sup>2</sup>BIH Center for Regenerative Therapies (BCRT), Charité - Universitätsmedizin Berlin, Berlin, Germany

<sup>3</sup>Swiss Institute of Bioinformatics

\*These authors contributed equally

1 **There is increasing interest in artificially selecting or breeding**  
2 **microbial communities, but experiments have reported mod-**  
3 **est success and it remains unclear how to best design such a**  
4 **selection experiment. Here, we develop computational models**  
5 **to simulate two previously known selection methods and com-**  
6 **pare them to a new “disassembly” method that we have devel-**  
7 **oped. Our method relies on repeatedly competing different com-**  
8 **munities of known species combinations against one another,**  
9 **and sometimes changing the species combinations. Our ap-**  
10 **proach significantly outperformed previous methods that could**  
11 **not maintain enough between-community diversity for selection**  
12 **to act on. Instead, the disassembly method allowed many species**  
13 **combinations to be explored throughout a single selection ex-**  
14 **periment. Nevertheless, selection at the community level in our**  
15 **simulations did not counteract selection at the individual level.**  
16 **Species in our model can mutate, and we found that they evolved**  
17 **to invest less into community function and more into growth.**  
18 **Increased growth compensated for reduced investment, how-**  
19 **ever, and overall community performance was barely affected**  
20 **by within-species evolution. Our work provides important in-**  
21 **sights that will help design community selection experiments.**

22 **Correspondence:** [sara.mitri@unil.ch](mailto:sara.mitri@unil.ch)

## 23 Introduction

24 Humans have been breeding plants and animals for centuries  
25 by allowing individuals with the most desirable traits to se-  
26 lectively produce offspring. Also known as “artificial selec-  
27 tion” or “directed evolution”, breeding has altered traits such  
28 as the size of fruits or the enzymatic activity of proteins used  
29 in biotechnology (1). More recently, we have started to ap-  
30 preciate that microbes — often multi-species communities of  
31 microbes — play an important role for health and the envi-  
32 ronment. One way to improve or optimize the functions and  
33 services that these microbes provide is to select for their traits  
34 in the same way as traditional breeding.

35 However, breeding microbial communities is less straightfor-  
36 ward than individual organisms (2, 3), mainly because the  
37 breeder selects whole groups of organisms rather than indi-

vidual plants, animals or proteins. According to evolutionary  
theory, group-level selection suffers from reduced heritabil-  
ity, one of the main requirements for evolution by natural se-  
lection (4). The problem arises when a single community-  
level “generation”, which we will call a “round of selec-  
tion” to avoid confusion, can comprise several generations  
of cells, each belonging to different genotypes (i.e. species  
and strains), (Fig. 1A). Since the genotypes all reproduce at  
varying rates, their relative abundances can change during  
one round of community growth and over subsequent rounds.  
Because community traits depend on the traits of all of its ge-  
netically distinct constituent members and their proportions,  
an “offspring” community may not resemble its “parent” (4–  
6). Another issue with group-level selection is that within-  
and between-species selection continue to operate within a  
round. If there are trade-offs between growth and contribu-  
tion to the community trait, cheaters that contribute less can  
emerge and sweep to fixation (2, 7). A third challenge is to  
find a good constellation of different community members  
and their proportions that can best achieve the desired func-  
tion. Generating different constellations of member species  
at each round of selection is also important to have enough  
variability for selection to act on (4). The major challenges  
for community-level selection then, are (i) ensuring that com-  
munity functions are heritable, (ii) that within-community  
selection does not dominate over between-community selec-  
tion, and (iii) ensuring variability, that communities differ in  
phenotype.

In the earliest community breeding experiments, Swenson *et al.*  
selected microbial communities to yield plants with high  
and low biomass and to control pH (8). In two out of three  
experiments, the communities selected for high vs. low func-  
tion differed significantly from each other, but were not sig-  
nificantly different from the starting communities. The re-  
sults were also noisy and inconsistent across experimental  
systems (8, 9). Many attempts have been made since, aim-  
ing to optimize several microbial community traits, includ-

ing increased microbial biomass production (10), the stimulation of various plant properties (10–15), chitin degradation (16), the stimulation of fruit fly development (17), to reduce wastewater CO<sub>2</sub> emissions (18), and to hydrolyze starch (19). Some of these studies have managed to significantly improve the *average* community function over several rounds of selection, but sometimes only as an effect of time without any significant differences between selection treatments (8, 16, 17). Overall, community breeding experiments have shown mixed success (3, 20), but computer simulations have provided some clues on how to improve them (5, 6, 21–23). All previous experiments have followed one of two methods to propagate the communities with the highest scores to the next round: in the “propagule” selection method (PS), a fraction of the cells in the highest-scoring communities are selected and transferred by dilution (Fig. 1B), while in “migrant pool” selection (MS), all populations of the selected communities are mixed in a *pool* before they are diluted in equal proportions to the new tubes (Fig. 1C). While both selection methods have achieved some success, they suffer from a rapid decrease in between-community variability (24), such that selection has little to act on. Intuitively, the loss of variability arises firstly because only a fraction of community members are selected and replicated for the next round. Second, species composition can only change through loss of members when the communities are diluted, meaning that the communities evaluated throughout the whole experiment can only be sub-communities of the initial ones. Given that finding the right species composition is one of the goals of community-level selection, this suggests that we need novel selection methods that can better explore the search space of species combinations (23).

In this manuscript, we propose a new selection method that we call “disassembly selection” (DS), that is designed to maintain heritability as well as between-community variability. After each round, we disassemble the selected communities by isolating the constituent species before recombining them into new communities for the next round of growth (Fig. 1D). We construct two computational models of microbes in a well-mixed liquid culture, one individual-based and one based on differential equations, to systematically compare our new approach to the classical propagule selection (PS) and migrant pool selection (MS) methods.

Inspired by a four-species community that degrades an industrial pollutant (25), we aim to select for microbial communities with improved degradation capabilities. Based on this experimental system, the microbes in our models face a dilemma: whether to invest consumed nutrients into growth

or into degradation of toxic compounds that would otherwise cause cell death. The populations evolve by random mutations to this relative investment. We evaluate the selection methods by comparing how the degradation scores change over several rounds of growth and selection starting from the same initial communities. We simulate community selection in both models separately, to test whether our results depend on the choice of model framework.

Our results confirm our intuition that propagule and migrant pool selection do not maintain enough variability to explore many different species combinations, which means that the communities can only improve by mutation. In contrast, our new disassembly approach maintains variability between communities, allowing it to find some of the best possible species combinations. Nevertheless, disassembly selection still suffers from an important problem in group selection: competition within species leads to the dominance of strains that invest less into the function and more into growth. Our work thereby suggests a new method to find species combinations whose community function is high, but in which between-individual competition may be inevitable.

## Results

**Simulating community-level selection.** In either model (see Methods for details), each species is described by its growth and uptake rates for each of 4 available nutrients, and its death and degradation rates for each of 10 toxic compounds. We assume that interactions between cells occur only via nutrients and toxic compounds, as cells of type  $i$  invest a fraction  $f_{ik}$  into degradation of the toxic compounds and the rest into growth. Cells of the same species differentiate by accumulating “mutations” as they grow and divide, that alter the total investment  $f_i = \sum_k f_{ik}$ . All other species properties remain unchanged throughout the simulations.

The simulations start with 21 communities of 4 species each, chosen at random with replacement from a set of 15 initial species, that are described by randomly drawn model parameters. The 21 communities are grown in simulated batch cultures containing defined initial concentrations of nutrients and toxic compounds for a fixed number of time-steps (Fig. 1F). At the end of each round, the 21 communities are scored based on degradation of the ten toxic compounds. The best 7 communities are then selected and propagated to the next round, depending on the selection method: communities are diluted in propagule and migrant pool, whereas they are re-inoculated to a defined population size with equal proportions in the disassembly method (Fig. 1B-D). In disassembly, communities are penalized by species extinctions, and

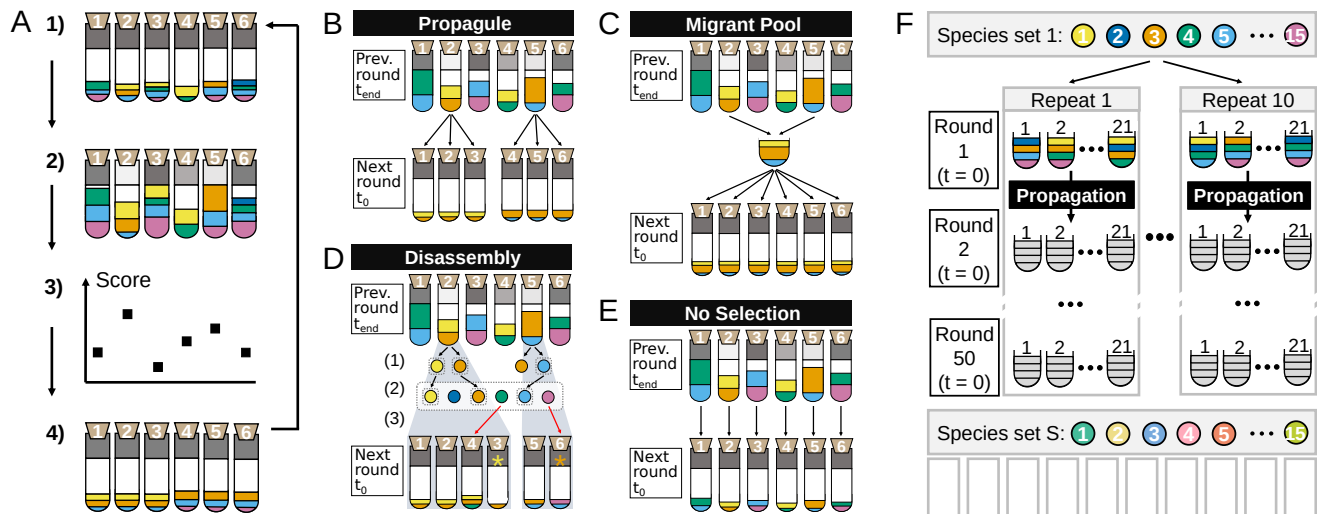

**Fig. 1.** (A) Overall method for artificial selection of microbial communities. Communities are illustrated as test tubes with bacterial “species” in different colors (white represents empty “space”). The concentration of toxic compounds is shown in shades of gray in the upper part of each tube (darker is more toxic). The inoculated communities (1) grow until the measurement (2) of toxic compound concentration, from which we (3) calculate a score for each community. (4) The highest-scoring communities are selected for propagation into offspring communities and the process is repeated. (B) Propagate: each selected community from the previous round is diluted to form the same number of communities for the next round. (C) Migrant pool: selected communities are merged before dilution. (D) Disassembly: Microbes are (1) isolated from the chosen communities and (2) saved in a repository (dotted rectangle). Each selected community contributes offspring communities in proportion to their degradation score (3). A fraction of the new communities receive new species (red arrows) or lose members from the previous round (asterisk in color of removed species). (E) No-selection control: each community is diluted into a new tube. Propagate, migrant pool and disassembly have selection treatments (PS, MS and DS) and random treatments (PR, MR and DR), where community scores are ignored (see Methods). (F) A “species set” consists of 15 randomly generated species. From this set, we draw 21 initial communities of 4 randomly chosen species each and for each of five species sets, simulate 10 repeats from different initial communities over 50 rounds of selection under each of the propagation methods (B-E).

170 communities are randomly chosen to receive or lose species 194  
 171 (Fig. 1D). We compare each method to a corresponding ran- 195  
 172 dom control line (e.g. random propagate: PR) where 7 com- 196  
 173 munities are chosen at random instead of according to their 197  
 174 score, and to a no-selection control (NS) where every com- 198  
 175 munity is diluted without selection (Fig. 1E). This last control 199  
 176 forms a baseline for how communities change due to species 200  
 177 interactions (23, 26). To achieve statistical power, 5 species 201  
 178 sets were generated, each with a new set of 15 species. From 202  
 179 each species set, we then sampled the 21 communities 10 203  
 180 times to run 10 replicate simulations, which were all sub- 204  
 181 jected to 50 rounds of selection. The same initial conditions 205  
 182 were used for the different selection methods to allow for a 206  
 183 fair comparison (Fig. 1F). 207

### 184 Disassembly finds communities whose degradation 209 185 ranks in the top percentile of all possible communi- 210

186 ties. All simulated selection methods succeeded in improv- 211  
 187 ing the median degradation score across the 21 communities 212  
 188 between round 0 and 50 (Fig. S1), which is consistent with 213  
 189 previous work (3, 23). However, DS was the only propa- 214  
 190 gation method to significantly and consistently improve the 215  
 191 maximum degradation score, meaning that on average, the 216  
 192 best community in round 50 degraded significantly better 217  
 193 than the best community in round 0 (one-sided Wilcoxon

signed rank-test  $n = 50$ , 10 repeated runs of 5 species sets,  $p < 10^{-9}$  for both IBM and ODE, Fig. 2A, C). The increase in maximum score in DS ( $0.22 \pm 0.06$ ,  $0.14 \pm 0.08$  for IBM, ODE), was also significantly different from the classical selection methods ( $-0.03 \pm 0.06$  and  $-0.12 \pm 0.09$  for PS and MS in the IBM, and  $-0.1 \pm 0.08$  for PS in the ODE), from its own random control (DR), and from NS (all two-sided Wilcoxon tests of diff. in max. degradation between DS and other methods,  $n = 50$ ,  $p < 10^{-9}$ , for IBM and ODE). For comparison, we computed the degradation scores of all  $2^{15} - 1 = 32767$  possible communities consisting of 1 up to 15 species for each species set and sorted them from best to worst. The communities found by DS ranked among the best few hundred in both our models, finding the very best community out of 32767 (Fig. 2D, F) in 17 out of 50 runs in the IBM and 23 out of 50 in the ODE. We next investigate what distinguishes these high-ranking communities.

### 209 Communities selected by disassembly invest more 210 211 into degradation and are composed of diverse species 212 213 with complementary phenotypes. In our model, com- 214

215 munity performance depends on (a) the overall investment 216  
 217 into degradation of toxic compounds relative to growth, and  
 (b) how well community members complement each other. Community members will compete less if they take up dif-

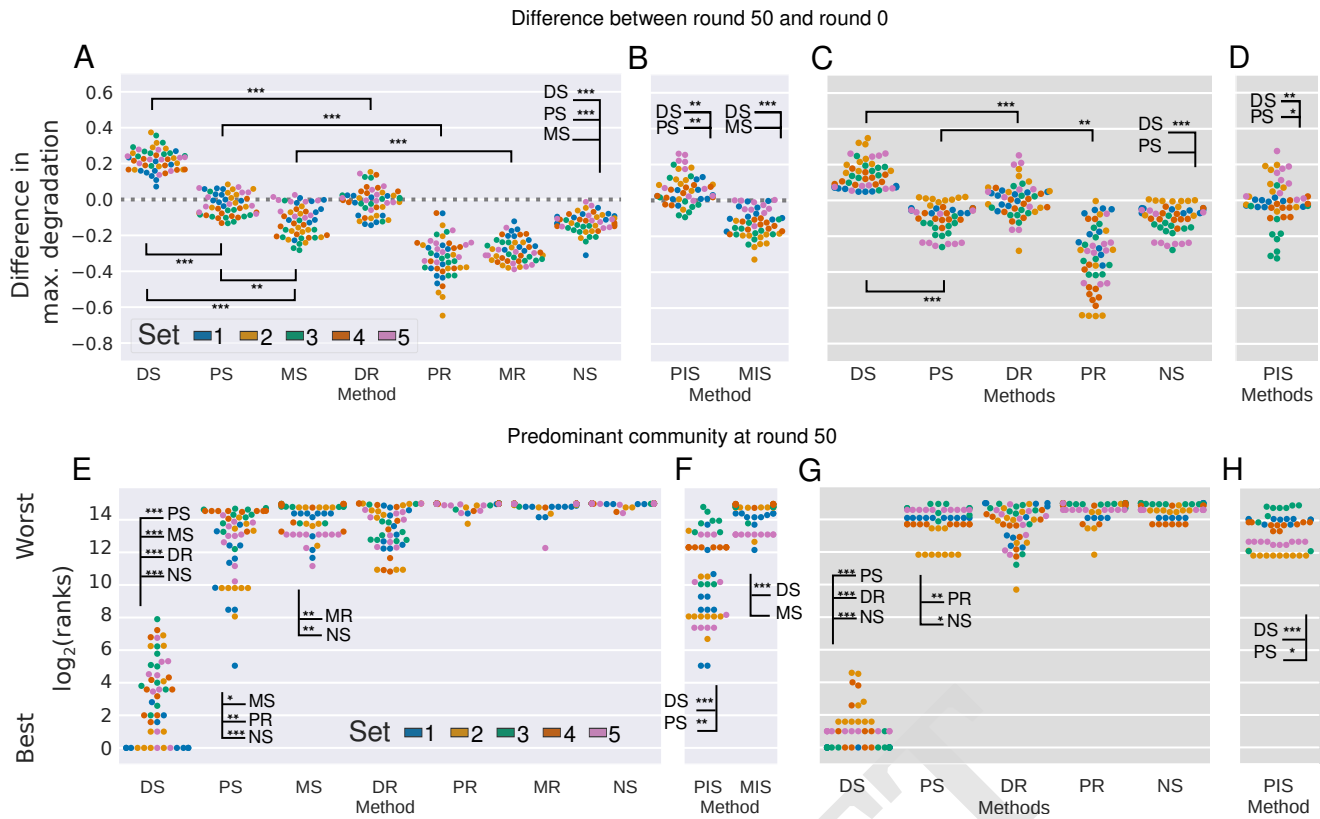

**Fig. 2.** Degradation scores and ranking of selected communities. Panels A, B, E, F with lighter background show results from the IBM, while panels C, D, G, H with darker background show results from the ODE model. Asterisks show the significance of a Wilcoxon signed-rank test for difference in degradation between methods (\*:  $p < 10^{-3}$ , \*\*:  $p < 10^{-6}$ , \*\*\*:  $p < 10^{-9}$ ). (A-D) The difference in maximum degradation score between round 50 and round 0 over the 21 communities is shown as one dot for each of 10 repeated runs, colored by species set, with 50 dots in total. As each run starts from identical communities for all methods, we have compared pairs of runs between the selection methods. (E-H) The rank of the predominant community (the most common combination of species among the 21 communities in the last round of selection, not counting sub-communities) in terms of its degradation score compared to all of the 32767 possible combinations of 1, 2, ..., 15 ancestral species. As above, each of the 50 dots marks 1 out of 10 repeated runs of 1 out of 5 sets of species.

218 ferent nutrients while the degradation score of a community 237  
 219 can increase if its members specialize on degrading different 238  
 220 toxic compounds (Eq. 1). 239

221 To understand how these two properties changed over time, 240  
 222 we first quantified the “total investment”, i.e. the fraction 241  
 223  $\sum_{k=1}^{10} f_{ik} < 1$  of resources invested into degradation of all 242  
 224 toxic compounds  $k$ , averaged over the species in each com- 243  
 225 munity. Starting from an average investment of 0.5, DS 244  
 226 finds communities that invest significantly more resources 245  
 227 into degradation at round 50 than in the first round (one-sided 246  
 228 Wilcoxon test of average total investment, all  $p < 10^{-9}$ ,  $n =$  247  
 229 50 for both IBM and ODE, Fig. 3A, C). This is not due to any 248  
 230 single species with unusually high degradation capabilities, 249  
 231 but rather because DS finds a combination of species with 250  
 232 high investment. The average within-community species di- 251  
 233 versity increases over the 50 rounds (Fig. 3E), which means 252  
 234 that the communities consist of an increasing number of 253  
 235 species and/or that the communities are increasingly even. 254  
 236 Accordingly, in DS, the effective number of consumed nu- 255

trients and toxic compounds increases over the 50 rounds 237  
 (Fig. 3F). This increase in coverage and community diversity 238  
 was not observed for the other selection methods (Fig. 3E, 239  
 Fig. S2). 240

Given the complementarity in nutrient uptake and toxic com- 241  
 pound degradation, one might expect species to grow and de- 242  
 grade better together compared to when they are alone, as 243  
 they may be facilitated by other species that degrade com- 244  
 pounds that they themselves cannot. We use “synergy” to 245  
 quantify whether a community property (e.g. degradation) is 246  
 greater than that of its member species together (Fig. 3G). 247  
 Against a baseline of all possible species combinations for 248  
 a given community size – richness in our models increases 249  
 niche overlap and competition for resources, which decreases 250  
 synergy – communities selected by DS have significantly 251  
 higher synergy, for both degradation and cumulative biomass 252  
 (Kruskal–Wallis  $H$  test,  $p < 10^{-9}$  in either case, Fig. 3G). 253

In sum, communities selected by DS invest more into degra- 254  
 dation compared to communities from other methods. These 255

256 communities are diverse in composition, consist of species 303  
257 with minimal niche overlap, and cover the toxic compounds 304  
258 evenly (Fig. 3F). 305

### 259 **Disassembly can explore more species combinations** 260 **by diversifying the selected communities.**

261 Seeing that communities selected by DS are diverse and efficient de-  
262 graders, we now investigate how the method finds these com-  
263 munities. First, DS explores more species combinations than  
264 the other methods (Fig. 4A, B, Fig. S3). The classical propa-  
265 gule method (PS) can only find sub-communities of the species  
266 combinations present in round 0. Similarly, while migrant  
267 pool (MS) is in principle able to search all sub-communities  
268 of the first set of selected communities, they are in practice  
269 limited to a smaller subset as species tend to go extinct due  
270 to the toxic compounds, inter-species competition and/or the  
271 dilution bottleneck at each round. Accordingly, most com-  
272 munities available for selection by PS or MS resemble one  
273 another, seen as a rapid drop in between-community (or beta)  
274 diversity (Fig. 4C, D, Fig. S4). In contrast, changing the  
275 species composition of some selected communities by insert-  
276 ing or removing species at random, DS can search a larger  
277 number of communities and the resulting drop in beta diver-  
278 sity is not as steep. The beta diversity of the no-selection  
279 control depends on the diversity of the initial communities. 306

### 280 **Propagule selection —but not migrant pool— per-** 281 **forms better by periodically adding species to se-** 282 **lected communities.**

283 In the disassembly method, more and 329  
284 better communities can be found by randomly adding and 330  
285 removing species in some of the communities. To explore 331  
286 whether species introduction could improve PS and MS in 332  
287 our models (previously shown for PS (23)), we implemented 333  
288 two new versions (PIS and MIS), where in each round, a 334  
289 fixed number of communities chosen at random will re- 335  
290 ceive one or more “invader” species (also chosen at ran- 336  
291 dom) with a defined initial population size. With this modi- 337  
292 fication, PIS increases the maximum degradation (one-sided 338  
293 Wilcoxon signed-rank test of degradation scores in round 50 339  
294 versus 0,  $p < 10^{-3}$ ,  $n = 50$ , Fig. 2B) and improves upon 340  
295 the standard PS method (two-sided Wilcoxon signed-rank 341  
296 test,  $p < 10^{-6}$ ,  $n = 50$ ) in the IBM. The results are how- 342  
297 ever model-dependent. While the PIS method still improved 343  
298 upon the PS method in the ODE model (two-sided Wilcoxon 344  
299 signed-rank test,  $p < 10^{-3}$ ,  $n = 50$ ), we did not find any 345  
300 significant improvements in the maximum degradation score 346  
301 compared to round 0 ( $p = 0.9$ ,  $n = 50$ , Fig. 2D). Further, 347  
302 PIS finds higher-ranking communities than PS in both the 348  
303 IBM (two-sided Wilcoxon signed-rank test for differences in 349

ranks between PIS and PS,  $p < 10^{-6}$ ,  $n = 50$ , Fig. 2F) and  
the ODE model ( $p < 10^{-3}$ ,  $n = 50$ , Fig. 2H) over the 50  
rounds. PIS can explore more combinations than the regular  
PS, and the initial drop in beta diversity is less severe in both  
models (Fig. 4A-D), indicating that there is more variability  
for selection to act on. In contrast, MIS does not improve  
significantly on MS, either in terms of degradation, ranks or  
investment. Even though MIS explores more species combi-  
nations than MS, the beta diversity rapidly drops (Fig. 4C),  
and the introduced species do not contribute much to diver-  
sity or degradation of the resulting communities.

### **Mutation and selection can decrease per-species in-** **vestment, but this increases biomass, maintaining** **community degradation.**

We have shown that DS can im-  
prove degradation by exploring many different species com-  
binations and find ones that rank highly. Shuffling species  
around is, however, not the only way to improve degradation  
scores. Our models allow for mutations to the parameter  $f_{ik}$   
that determines the trade-off between investment into degra-  
dation and biomass production for a cell. If a mutant is more  
competitive than its parent, it can replace the original type in  
future rounds, even as other species come and go around it.  
To investigate the effect of mutations, we now compare the  
investment into degradation of species at round 50 to that of  
their ancestors from round 0, and analyze how these changes  
affect degradation at the community level.

In DS, the total per-species investment  $\sum_{k=1}^{10} f_{ik}$  into degra-  
dation was significantly lower after 50 rounds of selection  
than that of the corresponding ancestral species (one-sided  
Wilcoxon signed-rank test of total investment in initial vs fi-  
nal round of selection,  $p < 10^{-6}$ ,  $n = 50$ , Fig. 5A, Fig. S5).  
Given the trade-off between investing into growth versus  
degradation, the communities made up of evolved species  
had greater total biomass than communities composed of the  
corresponding ancestral species (one-sided Wilcoxon signed-  
rank test of total AUC in communities, initial vs final round,  
 $p < 10^{-9}$ ,  $n = 50$ , Fig. 5B), such that overall, the degradation  
of the evolved communities was marginally but significantly  
higher ( $+6 \times 10^{-3}$  units, averaged over all species sets, one-  
sided Wilcoxon signed-rank test  $p < 10^{-3}$ ,  $n = 50$ ) than that  
of communities made up of their ancestors (Fig. 5C, Fig. S6).  
Compared to the improvement in degradation due to finding  
better species combinations, the improvement due to species  
evolution is very small and is not likely to have a large effect  
on the outcome of selection.

In summary, the disassembly method improved the degra-  
dation scores over the 50 rounds of selection by finding better

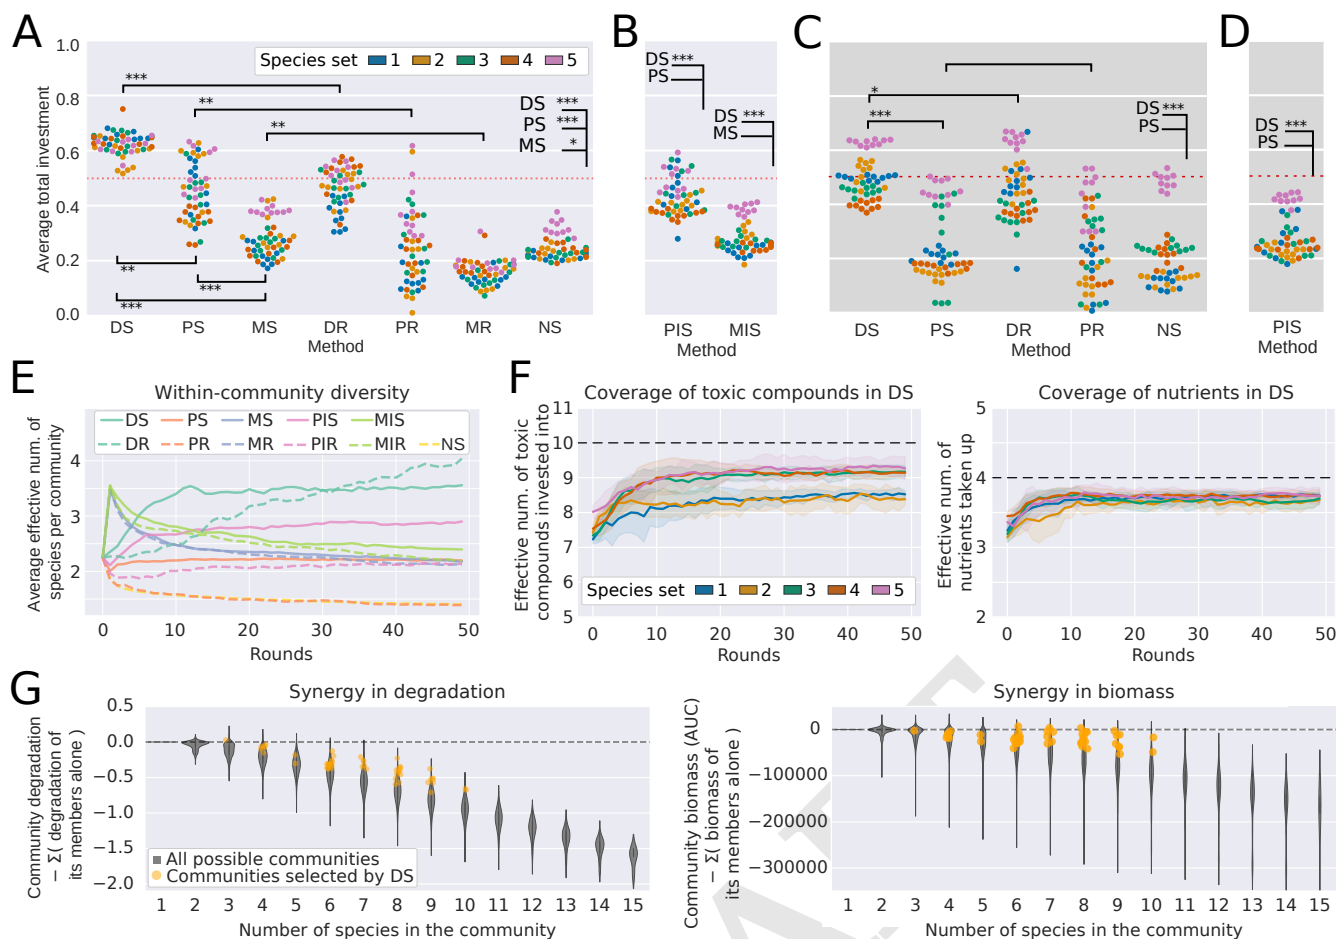

**Fig. 3.** Total investment into degradation, diversity, coverage and synergy in degradation. Data from the IBM shown on lighter background everywhere except for panels CD, which has data from the ODE model on darker background. **(A-D)** Average total investment in a community at round 50, averaged for the 21 communities in a run. For each species we calculate the average investment weighted by strain population and then we do the unweighted average of all the species in the community. The red dotted line at 0.5 indicates the theoretical mean investment at round 0. IBM results in panels A, B and from the ODE in C and D. One dot for each out of 10 repeated runs, colored by the 5 species sets, with 50 dots in total. The asterisks indicate the results of a Wilcoxon signed-rank test with  $n = 50$  (\*:  $p < 10^{-3}$ , \*\*:  $p < 10^{-6}$ , \*\*\*:  $p < 10^{-9}$ ). **(E)** Within-community species diversity measured as the effective number of species Eq. (13), averaged over all 21 communities in a run. The line shows the average over the 10 repeats and the 5 sets of species, with error bars per set of species in Fig. S2. **(F)** The coverage of toxic compounds and nutrients in communities selected by DS, measured as the effective number invested into ( $f_{ik}$ ) or taken up ( $n_{ij}$ ) respectively within a community (mean  $\pm$  s.d. over the 10 repeated runs for a given set of species), Table 1 (see Methods). Results from the IBM. **(G)** Synergy in communities selected by DS at round 50, grouped by community richness. Synergy is the difference in degradation scores (left panel) or biomass (right) between a co-culture and the sum of the values of the corresponding monocultures. The violin plot shows the distribution of synergy for each possible community of that richness level after one round of growth. The dots show the average synergy per repeated run in the last round for the 5 species sets. The average species richness per repeated run is rounded to obtain an exact value. For visibility, we have plotted all species sets in the same color.

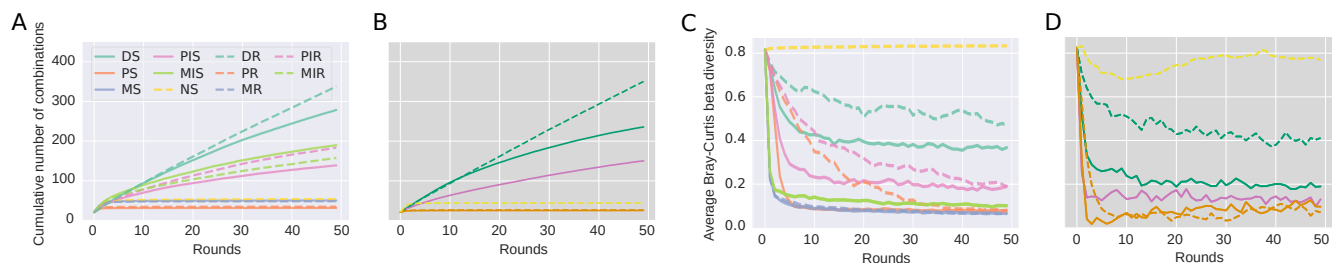

**Fig. 4.** Cumulative number of communities found by the selection methods and between-community diversity explain how DS can find better communities. We show the mean over the 10 repeats and 5 species sets for each propagation method and refer to Fig. S3-S4 for the full results. Results for the IBM and ODE model are shown against a light or a dark background, respectively. **(A, B)** Time series of cumulative number of unique communities for each selection method. **(C, D)** Between-community or beta diversity, calculated as the average Bray-Curtis distance of each pair of communities.

350 species combinations. Within those communities, individual 397  
351 species evolved to invest less into degradation and more into 398  
352 biomass production. As an effect of the trade-off between 399  
353 degradation and growth, the communities still maintain their 400  
354 degradation capabilities and the most efficient communities 401  
355 are the species combinations found in round 50, composed of 402  
356 either their ancestral or evolved genotypes. 403

### 357 **Communities selected by DS are less stable than** 358 **those selected by PS and MS.**

359 The disassembly method 405  
360 has features to ensure heritability and promote within- 406  
361 community diversity: we re-inoculate species in fixed and 407  
362 equal abundances, punish extinctions and re-inoculate ex- 408  
363 tinct species. Controlling the ecological dynamics so tightly 409  
364 means that if we were to simply transfer these communities 410  
365 without adjusting relative abundances and without selection, 411  
366 as in the no-selection treatment, they could drift towards a 412  
367 different equilibrium with a lower degradation score. To as- 413  
368 sess the ecological stability of the selected communities, we 414  
369 transferred the communities from round 50 for an additional 415  
370 25 rounds of growth and dilution, this time without selec- 416  
371 tion (Fig. 6A) and found that the degradation scores of com- 417  
372 munities selected by DS dropped by  $-0.21 \pm 0.14$  on aver- 418  
373 age when left to their natural dynamics, close to how much 419  
374 the selection method increased the degradation ( $0.22 \pm 0.06$ ). 420  
375 This indicates that the high performance of these commu- 421  
376 nities relied on controlling the ecological dynamics. This 422  
377 means that the communities converge, once ecologically sta- 423  
378 ble, to a degradation score that is not significantly different 424  
379 to the average of the initial communities (one-sided Wilcoxon 425  
380 signed-rank test,  $p = 0.24$ ,  $n = 50$ , Fig. 2A, B). 426

381 In contrast, the degradation does not drop as much in commu- 427  
382 nities selected by the classical methods PS and MS ( $-0.02 \pm$  428  
383  $0.03$  and  $-0.03 \pm 0.03$  in max degradation, respectively, 429  
384 Fig. 6A). The methods are stable in the sense that the com- 430  
385 munities do not change much after the first few rounds of 431  
386 selection, either in terms of composition (Fig. 3E) or degra- 432  
387 dation (Fig. S7). The methods with invasion, PIS and MIS, 433  
388 show an intermediate drop in degradation ( $-0.07 \pm 0.07$  and 434  
389  $-0.07 \pm 0.04$ ) indicating that the invasion step has an effect 435  
390 on community stability. In order to remain effective, the com- 436  
391 munities found by DS should be grown in the same condi- 437  
392 tions as they were selected, i.e. (i) from equal abundance, (ii) 438  
393 without any intermediate rounds of growth in between rounds 439  
394 of selection. The latter has been suggested to stabilize the dy- 440  
395 namics and improve the community selection (23). 441

### 395 **Varying experimental parameters to decrease the size** 396 **of the experiment.**

396 Our model shows that DS can outper- 443

403 form other propagation methods, as long as the ecological 404  
405 dynamics of the communities are controlled. However, DS 406  
407 is more cumbersome than the other methods from an exper- 408  
409 imental perspective: constantly dis- and re-assembling com- 409  
410 munities and having to adjust the population sizes of each 410  
411 species at every round could cost a lot of time and resources. 411  
412 We now investigate how four experimental parameters im- 412  
413 pact the degradation scores in DS, and affect experiment size. 413  
414 We focus on DS but also compare it to the other methods 414  
415 (Fig. 6B-E, Fig. S8-S11). 415

416 The parameter with the strongest effect on experiment size 416  
417 and the maximum degradation score is the number of species 417  
418 in the initial set (Spearman's rank correlation coefficient 418  
419  $\rho = 0.67$ ,  $p < 10^{-9}$ , Fig. S9). This means that the meta- 419  
420 community needs to be as rich as possible to efficiently im- 420  
421 prove degradation, and the main effort should be invested 421  
422 into managing a larger number of species, ideally by adding 422  
423 species that have positive effects on degradation or the growth 423  
424 of others. In contrast, the number of communities clearly 424  
425 affects experiment size, but it had a weaker correlation to 425  
426 degradation for DS ( $\rho = 0.35$ ,  $p < 10^{-9}$ ), meaning that the 426  
427 number of communities could be decreased, which would re- 427  
428 duce effort with a limited effect on community performance. 428  
429 Next, we turn to two parameters that affect the degradation 429  
430 scores but not size of the experiment. The number of com- 430  
431 munities receiving an invading species is negatively corre- 431  
432 lated with degradation ( $\rho = -0.29$ ,  $p < 10^{-9}$ ). Introducing 432  
433 species to a smaller number of communities should improve 433  
434 the final degradation score (Fig. S8). Finally, the dilution fac- 434  
435 tor (i.e. how large a fraction of the culture to re-inoculate for 435  
436 the next round of growth) is positively correlated to degra- 436  
437 dation scores ( $\rho = 0.52$ ,  $p < 10^{-9}$ ). 437

## 429 **Discussion**

430 The major challenges for community breeding are ensuring 430  
431 (i) that the community function is heritable, (ii) that within- 431  
432 community selection does not dominate over between- 432  
433 community selection and (iii) that communities differ suffi- 433  
434 ciently in phenotype. While other theoretical studies have 434  
435 investigated heritability and the balance between within- and 435  
436 between-community selection (6, 21–23), our “disassembly” 436  
437 method contributes to improving the third point: how to 437  
438 maintain variability between communities. 438

439 We have shown that disassembly can improve significantly 439  
440 upon the maximum degradation scores of simulated syn- 440  
441 thetic communities, compared to a random line and a no- 441  
442 selection control. The method further outperformed the clas- 442  
443 sical propagule and migrant pool methods, which could only 443

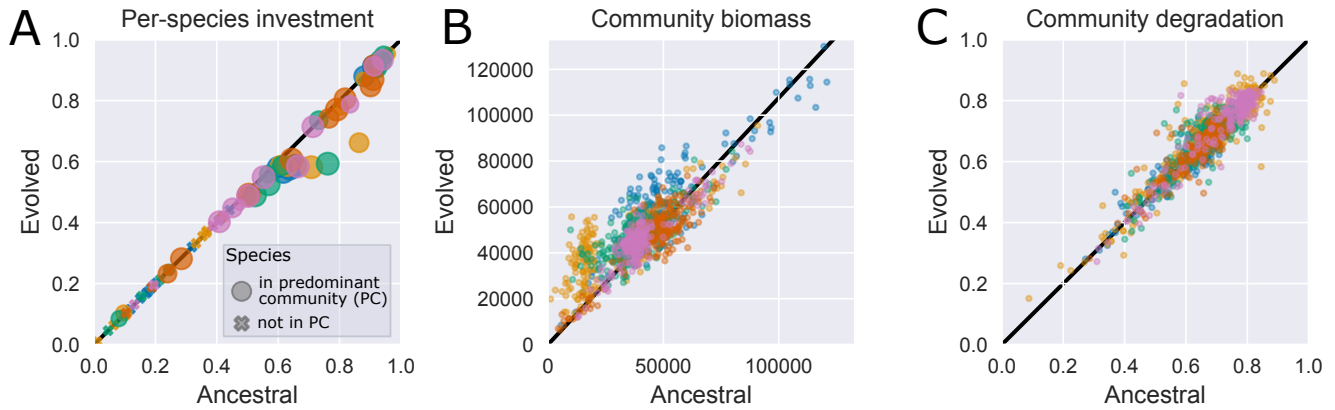

**Fig. 5.** Change in degradation investment per species and the effect of such change in the biomass and degradation of the communities in the last round, colored by species sets. All results from the IBM. **(A)** Total investment  $f_i = \sum_k f_{ik}$  for each species  $i = 1, 2, \dots, 15$ . There are 75 dots: 15 species, colored by the species sets 1-5. For evolved condition, the markers show the average total investment of the species, weighted by population size for each occurrence in communities from the last round of selection where the species is present and not weighted between repeated runs; while ancestral condition corresponds to the total investment of each ancestral species prior to any growth or evolution. Species that were present in a predominant community (PC., see definition in the caption of Fig. 2) in the last round are shown as circles, where the radius is proportional to the number of repeated runs where the species appear in a P.C. Species that were never present in a P.C. are represented by crosses. We summarize the p-values of Wilcoxon tests of whether the investment is different in the last round of selection compared to the first in Fig. S5. **(B)** Total biomass per community, measured as the sum of the area under the growth curves (AUC) for species in the community. The initial AUC is calculated from one round of growth, where the community is composed of ancestral strains of the same species in the same proportions as the last community. There are 1050 dots: 21 communities per 10 repeated runs, for each of the 5 species sets. **(C)** Degradation scores of the same 1050 communities in (B). The degradation of the initial community is calculated over one round of growth when the community is composed of ancestral strains of the same species.

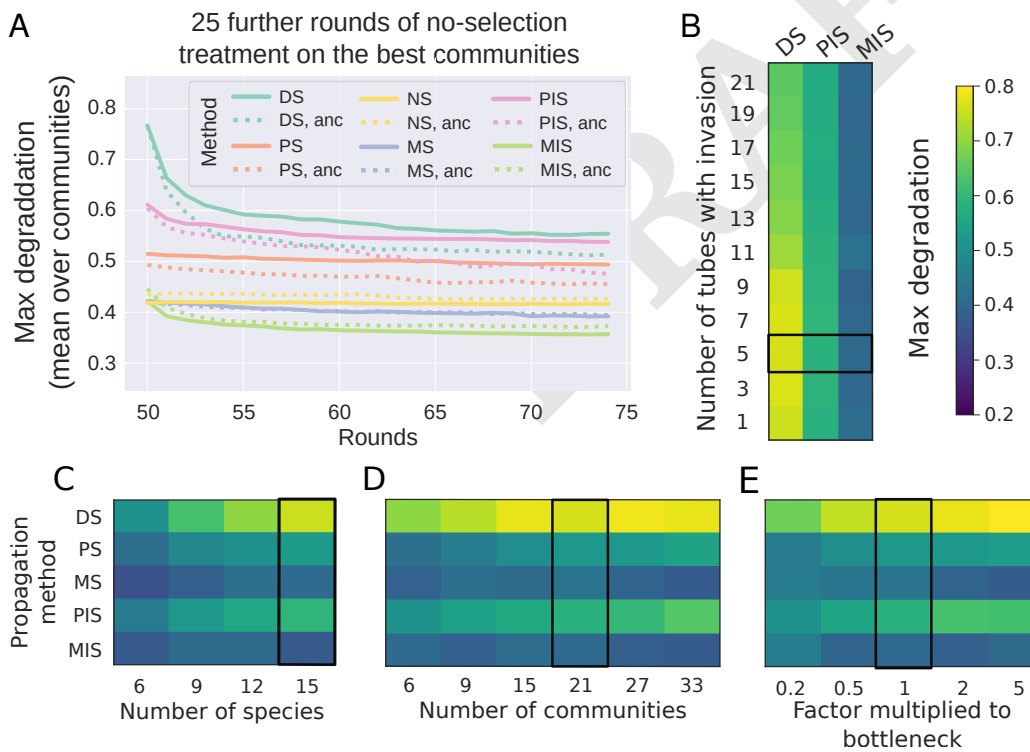

**Fig. 6.** **(A)** Stability in degradation over 25 additional rounds after releasing the selection pressure, calculated for the highest-scoring community for each selection method in the IBM. Results show the average degradation for each repeat. The dotted lines show the corresponding degradation when the community is composed of ancestral species. **(B-E)** Max. degradation score in the last round of selection as a function of the experimental parameters: **(B)** the number of tubes to receive or lose a species, **(C)** the number of species in the initial set, **(D)** the number of tubes or communities and **(E)** a scaling factor for the dilution bottleneck. The heat maps show the median degradation score over all species sets and repeated runs (in (C) also over sub-samples) for each selection method. Fig. S9-S11 show the full data set. The color bar is the same for panels B-E. The black outline marks the parameter value used throughout the rest of the paper. All data from the IBM.



444 improve the maximum function for some initial combination 492  
445 of species, confirming previous findings (3, 23). 493  
446 The problem with the classical methods is that they rapidly 494  
447 lose between-community diversity, which selection acts upon 495  
448 to improve community function. In these methods, diversity 496  
449 only arises through mutations, or through loss of species due 497  
450 to competition and dilutions between rounds of growth, while 498  
451 directed selection reduces between-community variability by 499  
452 only propagating a small subset of high-performing commu- 500  
453 nities. When communities become increasingly similar, fit- 501  
454 ness differences become increasingly random which makes 502  
455 selection less effective (23). By removing and introducing 503  
456 species, the disassembly method reshuffles the species com- 504  
457 position to access new communities that sometimes outper- 505  
458 form the original best community. As proposed in (23), we 506  
459 show that the classical methods can be improved by periodi- 507  
460 cally invading them with new species, which allows them to 508  
461 maintain some variability. This approach still under-performs 509  
462 compared to disassembly, however. 510  
463 In a sense, the disassembly method is inspired by the 511  
464 crossover operator used in genetic algorithms in the field of 512  
465 evolutionary computing (27–29), whereby building blocks 513  
466 are recombined between digital individuals and generate vari- 514  
467 ability for selection to act on. Of course, crossover in ge- 515  
468 netic algorithms is itself inspired by recombination in sex- 516  
469 ual organisms (30, 31). While interesting, these parallels do 517  
470 not map directly to species exchange in community breeding, 518  
471 where the units that are subject to exchange are well-defined 519  
472 and have their own ecology and within-species evolution. 520  
473 Next, heritability is crucial for evolution (32) and a major 521  
474 challenge for community selection (6). In the disassembly 522  
475 method, as in (6), we sidestep the issue of heritability and 523  
476 ecological stability by re-assembling communities in a fixed 524  
477 abundance and equal species proportions. In our models, this 525  
478 allows community dynamics to unfold in almost the same 526  
479 way after each transfer. The disadvantage of this approach is 527  
480 that we cannot guarantee that communities selected by disas- 528  
481 sembly would maintain either their community composition 529  
482 or function when propagated by regular dilution. One way to 530  
483 overcome this would be to include a few rounds of transfer- 531  
484 ring without selection to allow the communities to equilibrate 532  
485 before each selection step (23). This would, however, make 533  
486 disassembly quite inefficient, in which case, propagule with 534  
487 invasion can be more stable than disassembly (Fig. 6A). 535  
488 Another factor that we do not explore in detail here is the 536  
489 relationship between community stability and the timing of 537  
490 selection. While our model is robust to timing errors, a com- 538  
491 munity that degrades the toxic compounds too quickly can in 539

principle be invaded by cheater cells that profit from the initial degradation and out-compete degraders in the absence of toxic compounds (6). Such ecological succession was found in a chitin-degrading community (16, 33).

While we have focused on increasing community performance from an applied perspective, our study provides important insights into discussions on the levels of selection and whether group selection can dominate over individual-level selection. Our choice to implement mutations (unlike other theoretical studies (23)) means that selection will also act at the level of individual genotypes. We found that competition between individuals is indeed strong in our simulated communities, leading individual species to reduce their investment into degradation in favor of growth. Interestingly, though, the faster growth rate of these evolved species compensates for the reduced investment by producing larger population sizes of degraders, such that the difference in degradation between ancestral and evolved communities was negligible. Our approach does not overcome within-community selection for growth, but this may not impact community function as much as one might expect when the community function is indirectly coupled to growth. Going back to the practical perspective, in a lab setting, it may be worth investigating whether the best selected species composition is more efficient when assembled from ancestral or evolved strains.

Ultimately, the goal of our investigation is to help design experiments rather than just computer simulations. While we found that our method can efficiently search for better species combinations, its scope is limited to communities that can be disassembled in the lab, and the effort needed to find out how to isolate species from the communities should not be underestimated. We have, however, confirmed that a periodic introduction of species (which is possible independently of whether we can remove species or disassemble the communities) improves the propagule method (23) to balance experimental feasibility and improvement of community functions. From an experimenter's perspective, it is also useful to consider where one can reduce the size and complexity of the experiment. We find that the parameter with the biggest effect on the method is the size of the initial species set and that the disassembly method is more efficient for larger sets of species (Fig. 6). Disassembling rich communities may however prove quite challenging in practice, and future experimental work will aim to make this step more efficient. We also find that for disassembly, a higher number of communities grown in each selection round can compensate for the number of selection rounds needed since we are then able to search more distinct communities per round of selection.

We have made a number of assumptions for our models. First, we assume a well-mixed liquid culture, where in reality, clumps may affect species interactions and community function. We also assumed a trade-off between degradation and growth in both models and that the toxic compounds cannot be used as nutrients. Both assumptions serve to decouple the community phenotype from population growth and while they are not completely independent, a smaller contribution from growth on the community phenotype should make artificial selection more difficult. In a sense, this is the more interesting problem to explore, since all the methods we explored are expected to improve a community phenotype that is aligned with population growth. Further, we have assumed that species diversity is key to functional diversity: each species can only degrade a subset of the toxic compounds in our model and complete removal of the compounds depends on finding other species with complementary degradation capabilities. Within-community diversity is in this way fundamental for community success, and also decreases competition, as each species only uses a subset of the nutrients. In our simulations, it is therefore unlikely that any mono-culture scores higher than a multi-species community and the median size of a selected community was  $6.9 \pm 1.8$  species after 50 rounds of selection by disassembly (in the IBM model). This optimum will, however, differ for each system (25).

Taken together, we have introduced a new approach to community selection, where species composition is shuffled between competing communities, allowing for a greater exploration of the space of possible communities to find the best performing ones. In doing so, we have been able to improve community function with respect to randomly assembled communities, but show that genetic mutation can contribute to reduced investment by individual strains into community function. We are testing this approach experimentally in parallel work.

## Materials and methods

**Growth and community function.** We separately implement an individual-based model (IBM) of individual cell growth and a system of ordinary differential equations (ODEs) that model population-level dynamics. Both models simulate different microbial species growing together in batch culture, in a medium containing 4 types of nutrients that allow cells to grow, and 10 toxic compounds that cause cell death. Species are described by how quickly they grow, the rate at which they convert nutrients into biomass and how they are affected by toxic compounds. We describe the details

of both models in the following sections. All interspecies interactions are due to the consumption of nutrients and degradation of the toxic compounds. The concentration of each nutrient  $j = 1, 2, 3, 4$  is denoted by  $N_j$  and the concentration of each toxic compound  $k = 1, 2, \dots, 10$  is denoted by  $T_k$ . The removal of toxic compounds in either model is determined by the parameters  $f_{ik}$  that denote the fraction of resources that a cell (IBM) or population (ODE) of type  $i$  invests into the degradation of toxic compound  $k$ . The remaining fraction  $1 - \sum_k f_{ik}$  is invested into growth. As we describe in the following section,  $f_{ik}$  is the only parameter that is subject to mutation and therefore gives rise to different strains of the same species.

Communities are created in two steps: First we draw a library of 15 species, each with unique (random) combinations of model parameters sampled as described in Table 1 and 2. These species are then randomly assigned (with replacement) to 21 communities of four species each, such that each species is present in at least one community.

In each round, each community grows and degrades the toxic compounds independently of the other communities, for 80 time-steps in the IBM and 100 in the ODE model. The root-mean-square decrease in  $T_k$  from the initial time point  $t_0$  to the last  $t_{end}$  forms the basis of our community function, the degradation score  $D$ :

$$D = 1 - \sqrt{\frac{1}{10} \sum_{k=1}^{10} \left( \frac{T_k(t_{end})}{T_k(t_0)} \right)^2}. \quad (1)$$

These scores are used to rank the communities, so that we can propagate the best ones by the different selection methods (elaborated below). To compare the selection methods, we simulate 50 rounds of growth, degradation and selection with the different methods. Upon propagating communities to fresh medium, we only transfer the cells and no leftover media. To reduce bias due to initial conditions, we run 10 simulations with different initial communities for each out of 5 sets of 15 species (Fig. 1F). The same exact set of initial conditions is used for all selection methods to make comparisons fair.

**Within-species evolution.** In both models, a strain  $i$  of the ancestral species  $l_i$  ("I" as in lineage) invests a fraction  $0 \leq f_{ik} \leq 1$  of the resources that they take up into degradation of toxic compound  $k$ . These fractions can mutate, creating new strains of the same species that invest different amounts into degradation and the rest,  $1 - \sum_k f_{ik}$ , into population growth. The mutations take place at cell division in the IBM and during community replication in the ODE. The dis-

631 tion between “species” of a fixed set of 15 and “strains”, 673  
 632 that emerge from an ancestral strain of each species as mu- 674  
 633 tations arise, is important. For example, in the disassembly 675  
 634 method described below, we inoculate a fixed concentration 676  
 635 of each *species* in each round, which can consist of different 677  
 636 *strains* of the species, depending on their frequency in the 678  
 637 previous round. 679  
 638 To evaluate the evolution of the total investment  $f_i = \sum_k f_{ik}$  680  
 639 (Fig. 5A) of species  $l$ , we compare the investment of the an- 681  
 640 cestral strain  $i$  to that in the last round of selection (or as late 682  
 641 as possible in case the species went extinct). The average 683  
 642 per-species investment is weighted by the population size  $S_i$  684  
 643 of the different strains  $i$  of species  $l$ ,

$$\tilde{f}_l = \sum_{i \text{ of species } l} S_i f_i / \sum_i S_i \quad (2)$$

644 to emphasize the investment of abundant strains instead of 685  
 645 small recent mutants that have not contributed as much to the 686  
 646 community function. The value  $\tilde{f}_l$  is further averaged over 687  
 647 the 10 repeated runs (recall: each run starts from the same 688  
 648 set of species) for each of the 15 species, without weighting 689  
 649 by population size. For the statistical comparison, we hence 690  
 650 have 75 data points: 15 species per each of the 5 sets. 692

651 **Individual-based model (IBM).** We simulate well-mixed 693  
 652 batch cultures that initially contain 10 cells per species in 694  
 653 the communities. All cells are initially equally exposed to 695  
 654  $T_k(t_0) = 700$  units of each of the 10 toxic compounds, which 696  
 655 can cause cell death (see below), and have equal access to 697  
 656  $N_j(t_0) = 2000$  units of each of the 4 nutrients that allow the 698  
 657 cells to divide and reduce the concentrations of toxic com- 699  
 658 pounds (see below). These processes occur according to the 700  
 659 parameters of each strain  $i$  (Alg. 2, Table 1, Fig. S12). 701

660 Cell division consists of two steps, here called “activation” 702  
 661 and “replication”, that respectively involve the acquisition of 703  
 662 some nutrients by the cell and their utilization for cell repro- 704  
 663 duction (34). Cells of strain  $i$  share their parameters (Table 1) 705  
 664 and can be in either of two states: the initial “inactivated” 706  
 665 with population size  $p_{i0}$ , or the “activated” with size  $p_{i1}$ . Ev- 707  
 666 ery activation, replication, mutation and death event occurs 708  
 667 with a given probability by random sampling from a Poisson 709  
 668 distribution with rate  $population \cdot probability$  (22). 710

669 Degradation and activation are costly and are carried out first. 711  
 670 At each time step, a cell of type  $i$  can take up an amount  $n_{ij}$  712  
 671 of the nutrient  $j$  with current concentration  $N_j$ , with 713

$$max\_uptake = \sum_j (n_{ij} \text{ if } N_j > n_{ij}). \quad (3)$$

672 The *max\_uptake* scales down the amount of degradation 717

or the probability to activate when not all the nutrients con-  
 sumed by the cell are present.

Regardless of their activation state, at each time step, all the  
 cells of a strain (i.e. the total population size  $S_i = p_{i0} + p_{i1}$ )  
 degrade the amount  $f_{ik} \cdot max\_uptake$  units of each toxic  
 compound  $k$ , consuming  $f_i$  units of nutrients in total. If there  
 are not enough nutrients, a smaller fraction of  $S_i$  degrades,  
 determined by the amount of nutrients available. When a  
 toxic compound is depleted, its degradation and thus the cor-  
 responding nutrient consumption does not occur.

Following degradation, an inactive cell can activate with  
 probability

$$a_i \cdot (1 - \sum_k f_{ik}) \cdot max\_uptake \cdot \sum_j \left( \hat{n}_{ij} \frac{N_j(t)}{N_j(t_0)} \right), \quad (4)$$

685 where  $\hat{n}_{ij}$  is a re-scaled version of  $n_{ij}$ : if some nutrients are  
 686 depleted, their  $n_{ij}$  are set to 0 and the  $n_{ij}$  of the remaining  
 687 nutrients are re-scaled such that  $\sum_j n_{ij} = 1$ . To activate, a  
 688 cell of type  $i$  consumes in total  $1 - f_i$  units of nutrients and if  
 689 it does not replicate, it needs the same amount of nutrients  
 690 in subsequent time steps to remain activated.

691 The amount of nutrient of type  $j$  that is consumed for degra-  
 692 dation and activation depends on the parameters  $n_{ij}$  and on  
 693 the amount of each nutrient that is available. When one  
 694 type of nutrient gets depleted, cells will take up more of the  
 695 other available nutrients that they require. At every time step  
 696 we check how many cells of strain  $i$  can degrade and acti-  
 697 vate based on the scarcest nutrient. Thus, when a nutrient  $j$   
 698 is nearly depleted, fewer cells that require this nutrient de-  
 699 grade and have the chance to activate in the current time  
 700 step. In following time steps, when nutrient  $j$  is depleted,  
 701 cells consume the remaining required nutrient types. So, al-  
 702 though now cells would use nutrients less efficiently, if these  
 703 nutrients are sufficiently abundant, a greater population can  
 704 degrade and activate. This models a pause in degradation  
 705 and division caused by a metabolic shift towards consum-  
 706 ing fewer nutrients. These events are stochastic and lead to  
 707 noise between runs of the model with the same starting con-  
 708 ditions. When we calculate the growth and degradation of  
 709 specific communities such as the 32767 possible combina-  
 710 tions of species (Fig. 2 E-F, Fig. 3 G), we average the results  
 711 over three replicates of the simulations. We use the same seed  
 712 for the random number generators for consistency.

713 At each time step, activated cells divide with probability  $r_i \cdot$   
 714  $(1 - f_i)$  without additional cost, resulting in two inactivated  
 715 daughter cells: one daughter maintains the parameter values,  
 716 and the other is susceptible to mutation with probability  $\mu =$   
 717 0.01. Upon mutation, the previous value of at least one  $f_{ik}$

| Parameter | Description                                                                    | Randomly sampled from                                                      |
|-----------|--------------------------------------------------------------------------------|----------------------------------------------------------------------------|
| $l_i$     | Species ID of strain $i$                                                       |                                                                            |
| $a_i$     | Activation probability                                                         | Beta(2,2)                                                                  |
| $r_i$     | Replication probability                                                        | Beta(2,2)                                                                  |
| $n_{ij}$  | Consumption rate of nutrient $j$                                               | Uni(0,1), Sparse,<br>Rescaled so that<br>$\sum_j n_{ij} = 1$               |
| $f_{ik}$  | Fraction of consumed nutrients invested into degradation of toxic compound $k$ | Uni(0,1), Sparse,<br>Rescaled so that<br>$\sum_k f_{ik} = \text{Uni}(0,1)$ |
| $m_{ik}$  | Death rate of strain $i$ due to toxic compound $k$                             | Uni(0.001,0.02), Sparse                                                    |

**Table 1.** Parameters defining a microbial strain  $i$  in the IBM. Growth rates, death rates and degradation investment vectors  $r_{ij}$ ,  $m_{ik}$  and  $f_{ik}$  are made sparse by multiplying them by a vector drawn from Bernoulli(0.5). Each species can this way only take up a random fraction of nutrients, be affected by a random fraction of the toxic compounds and degrade another fraction of the toxic compounds. Despite changing by mutation, the total investment  $f_i$  is limited to the interval  $[0, 1]$ .

718 is multiplied by a random number from the lognormal ( $\mu =$   
719  $0, \sigma^2 = 0.4$ ) distribution, making sure the total investment  $f_i$ .  
720 falls in the  $[0, 1]$  interval. As a result, a new strain of the  
721 same species with population  $p_{i0} = 1$  is introduced.

722 At each time step, activated and inactivated cells may die with  
723 a probability determined by the following Hill function:

$$\sum_k m_{ik} \frac{T_k^2}{T_k^2 + K^2} \quad (5)$$

724 Where  $T_k$  is the current concentration of toxic compound  $k$   
725 and the constant  $K = 700$ .

**Population-level model.** As the IBM above, the ODE 733  
model simulates well-mixed batch cultures with nutrients and 734  
toxic compounds, extending a previous model (25). In the 735  
model, the population size  $S_i$  of each strain  $i$  in a community 736  
grows in relation to the concentrations of nutrients  $N_j$  and 737  
decline by the toxic compounds  $T_k$  (Fig. S13) by the model 738  
parameters in Table 2. Growth, death, nutrient uptake and 739  
degradation is described by the following ODE system: 740

$$\frac{dS_i}{dt} = \left( (1 - \sum_k f_{ik}) \rho_i(\mathbf{N}) - \mu_i(\mathbf{T}) \right) S_i \quad (6)$$

$$\frac{dN_j}{dt} = - \sum_i \frac{\rho_i(N_j)}{Y_i} S_i \quad (7)$$

$$\frac{dT_k}{dt} = - T_k \sum_i f_{ik} \delta_i \rho_i(\mathbf{N}) S_i \quad (8)$$

The bold-face  $\mathbf{N}$ ,  $\mathbf{T}$  denote the vectors of all nutrients and 750  
toxic compounds, respectively. We assume Monod and Hill 751

functions for the per-capita growth and death rates  $\rho_i, \mu_i$ .

$$\rho_i(\mathbf{N}) = \sum_j r_{ij} \frac{N_j}{N_j + K_N} \quad (9)$$

$$\mu_i(\mathbf{T}) = \sum_k m_{ik} \frac{T_k^2}{T_k^2 + K_T^2} \quad (10)$$

726 The system of equations Eq. (6)–Eq. (8) is solved with a stan-  
727 dard ODE solver (dopri5, (35, 36)) for 100 time steps with  
728 initial conditions  $S_i(t_0) = 100$ ,  $N_j(t_0) = 100$  and  $T_k(t_0) =$   
729  $100$  for all  $i, j, k$ .

730 The investment  $f_{ik}$  can mutate to form different strains of  
731 the same species. When this happens, we add a new popula-  
732 tion equation of the type Eq. (6) to the ODE system, with the  
same parameters  $r_{ij}$ ,  $m_{ik}$ ,  $Y_i$  and  $d_i$  as the ancestor but with  
the modified  $f_{ik}$ . To not make the system of equations too  
large, we have limited the number of strains to 28 per com-  
munity. We estimate this to be enough since we expect mu-  
tants to rapidly replace their ancestral strains if their growth  
rate is higher, and otherwise disappear rapidly. If there are  
already 28 strains in a community, then no more mutants are  
allowed. Otherwise, when communities are propagated to the  
next round of growth, any surviving strain can have a mutant  
with probability 0.05. Having chosen which strains  $i$  to mu-  
tate, we pick one or more traits  $f_{ik}$  at random and multiply  
them by numbers drawn at random from lognormal(0, 0.4)  
and ensure that both the mutated traits  $f_{ik}$  and the total in-  
vestment  $f_i$  falls in the  $[0, 1]$  interval. The mutant receives  
the same  $r_{ij}$ ,  $m_{ik}$ ,  $Y_i$  and  $d_i$  parameters as its ancestor and  
is introduced with population size 100, the same as the initial  
population before the first round of growth. This population  
size is chosen relatively high, in order to speed up the com-  
petition between ancestor and mutant strain.

| Parameter  | Description                                                                            | Sampled from                                                             |
|------------|----------------------------------------------------------------------------------------|--------------------------------------------------------------------------|
| $l_i$      | Species ID of strain $i$                                                               |                                                                          |
| $r_{ij}$   | Maximum growth rate with respect to nutrient $j$                                       | Uni(0.01, 0.1)<br>Sparse                                                 |
| $K_N$      | Half-saturation constant for nutrients                                                 | $K_N = 10$<br>(fixed)                                                    |
| $m_{ik}$   | Maximum death rate with respect to toxic compound $k$                                  | Uni( $10^{-4}$ , $10^{-3}$ )<br>Sparse                                   |
| $K_T$      | Half-saturation constant for toxic compounds                                           | $K_T = 10$<br>(fixed)                                                    |
| $f_{ik}$   | Fraction of amassed nutrients that are invested into degradation of toxic compound $k$ | Uni(0, 1), Sparse<br>Rescaled so that $\sum_k f_{ik} = \text{Uni}(0, 1)$ |
| $Y_i$      | (Average) biomass yield with respect to the nutrients                                  | lognormal( $\log(10^{-3})$ , $\log(5)$ )                                 |
| $\delta_i$ | (Average) degradation efficiency with respect to the toxic compounds                   | lognormal( $\log(10^{-4})$ , $\log(5)$ )                                 |

**Table 2.** Parameters defining a microbial strain  $i$  in the ODE model. Growth and degradation parameters in relation to nutrients and toxic compounds  $N_j$  and  $T_k$ . All parameters are assumed to be positive, and the investment  $f_{ik}$  is limited to the interval  $[0, 1]$ . The matrices of growth rates, death rates and degradation investment  $r_{ij}$ ,  $m_{ik}$  and  $f_{ik}$  are made sparse by multiplying them by matrices drawn from Bernoulli(0.5), i.e. flipping a coin for each entry. In this way, each species takes up approximately half of the nutrients, is affected by half of the toxic compounds and degrades half of the toxic compounds.

**Artificial selection methods.** After scoring all communities in a given round (see above), a fraction of these “parent” communities is propagated to “offspring” for the next round of growth (Fig. 1A, Alg. 1). Here we implement several methods of propagating the selected communities as described below (Fig. 1B, C), and compare them to a no-selection control (NS) where each community is propagated by 100-fold or approximately 20-fold (stochastic process based on Poisson distribution) dilution, respectively for the ODE model or IBM (Fig. 1E). NS shows the baseline change in community function due to interspecies interactions and changes to the species composition (23).

**Propagule selection.** In the propagule method, the 7 communities with the highest scores are propagated to the next round by dilution (10, 24) (Fig. 1C, Alg. 7, Alg. 8). The communities are populated uniformly such that each selected parent contributes 3 offspring communities for the next round. The important design parameters are the dilution factor and the fraction of communities to propagate, i.e. the selection bottleneck. In previous experimental studies, dilution factors between 5 and 30 have been used for bottlenecks between 1/10 and 1/3 of parent communities (8–10, 17, 19). We keep a wide bottleneck, selecting 7 out of 21 communities, before diluting them by a factor 100 (ODE model) or approximately 20 in the IBM (where population sizes are smaller and we

sample the cells to propagate at random, according to a Poisson distribution) for the next round. See also simulation studies in (5, 6, 22, 23, 37). We compare PS to the random control PR, where the communities are selected at random without regards to their degradation scores. We also compare PS to a version that we call propagule with invasion (PIS) and its corresponding random control (PIR). In this version, we introduce at least one species to 5 out of the 21 offspring communities (chosen at random with uniform probability) (23).

**Migrant pool selection.** Here, selected parent communities are mixed in a *migrant pool* before new offspring communities are formed by taking samples from the pool (10, 24) (Fig. 1D, Alg. 9). Previous experiments have used microbial communities from wastewater (18), soil and rhizospheres (8, 10–14), marine environments (16) and other strain collections (38), selecting between 1/10 and 2/7 of communities and diluting them by factors between 1/100 and 1/2. The method has also been subject to at least one simulation study (5). We select 7 communities out of 21, merge them in a pool and create 21 new communities by sampling without replacement cells from the pool with an approximately 20-fold dilution (stochastic process according to Poisson distribution). We compare MS to a random control (MR), where we select communities with uniform probability without regards to their degradation scores. We also implement a version of mi-

802 grant pool selection where we introduce one or more species 844  
803 to 5 out of the 21 offspring communities (chosen at random 845  
804 with uniform probability), and call this migrant pool with in- 846  
805 vasion (MIS and the random control MIR). 847

806 **Disassembly selection.** Our proposed method is intended for 848  
807 synthetic communities, where each species can be grown sep- 849  
808 arately and isolated from a multispecies community, such that 850  
809 the communities can be disassembled between transfers. We 851  
810 select 7 out of 21 parent communities by degradation scores 852  
811 (Fig. 1D, Alg. 10). By disassembling these communities, 853  
812 we maintain a record of samples of each species that were 854  
813 present in at least one selected community in each round. If 855  
814 a species is present in more than one selected community, we 856  
815 sample from the highest-scoring community that this species 857  
816 was part of. In this way, we are able to re-introduce any 858  
817 species that went extinct. 859

818 To select against extinctions and communities whose mem- 860  
819 bers out-compete one another, we scale the degradation score 861  
820  $D$  by the fraction of surviving species at the end of a round 862  
821 of growth as follows: 863

$$\hat{D} = D \times \frac{\text{number of surviving species}}{\text{number of species in the community}}. \quad (11)$$

822 For example, if a 5-species community loses one member 864  
823 species, its degradation score is scaled by 0.8. Next, we draw 865  
824 21 offspring communities from the 7 ( $n = 1, \dots, 7$ ) selected 866  
825 parent communities for the next round of growth, in propor- 867  
826 tion to their scores  $\hat{D}$  with probability: 868

$$\frac{1}{\sum_k \hat{D}_k} \hat{D}_n, \quad (12)$$

827 for each selected community. In this way, parent communi- 870  
828 ties with (i) high degradation scores and (ii) low or no extinc- 871  
829 tions will have more offspring. The offspring communities 872  
830 have the same species composition as their parents, but we 873  
831 reset the initial abundance of each species to a specified pop- 874  
832 ulation size (100 in the ODE, around 10 cells in the IBM by 875  
833 a random sampling with replacement from a Poisson distri- 876  
834 bution) to standardize the growth conditions between rounds, 877  
835 i.e. to maintain heritability. 878

836 To introduce variability between communities, we change the 879  
837 species composition of a few of the 21 offspring communi- 880  
838 ties. First, we choose 5 offspring communities at random 881  
839 and remove one or more species, always one species plus an 882  
840 additional number drawn from Poisson(0.5). If the drawn 883  
841 number is equal to or higher than the number of species cur- 884  
842 rently in the community, we leave one species to avoid emp- 885  
843 tying or completely changing the community composition. 886

Having found a number of species to remove, we choose the species to remove with uniform probability, but avoid removing any species that is present in only this community. Next, we introduce one or more invader species—as above,  $1 + \text{Poisson}(0.5)$ —chosen with uniform probability from the frozen stock, to 5 randomly chosen communities. These 5 are chosen anew and could be the same communities that we just removed species from, or not. In order to maintain diversity, we ensure that all species appear in at least one community by preferentially introducing species that are not currently present in any offspring community. See Alg. 10 for more details.

**Statistical and other analyses.** Correlations are evaluated by the Spearman’s rank correlation coefficient  $\rho$ . We compare selected communities to the set of all possible communities by a Kruskal–Wallis  $H$  test for differences in median. We use the scipy (36) implementations for all three methods. We quantify species diversity within a community (Fig. 3E, Fig. S2) as the Hill number of order 1 or the average effective number of species present in the community (39, 40), which is based on the Shannon index  $H'$ :

$$\exp(H') = \exp\left(-\sum_{l=1} p_l \log p_l\right), \quad (13)$$

which in turn depends on the species’ relative abundances

$$p_l = S_l / S_{tot} \quad (14)$$

where we divide the population size  $S_l$  of each species by the total population size in the community  $S_{tot} = \sum_l S_l$ . If more than one strain is present, we sum up their population sizes to find the species’ total population size. We then average  $\exp(H')$  over all communities to find the average effective number of species. The measure falls between 0 and 15 effective species in an average community.

Beta diversity (Fig. 4 C, D, Fig. S4) is calculated by considering each community as a vector of the population sizes of the 15 species. Species absence from the community is marked by zero. We find the beta diversity as the average Bray-Curtis dissimilarity of each of the 210 possible pairs in the 21 communities.

The community coverage of nutrients and toxic compounds (Fig. 3F) is quantified similarly to species diversity, as the effective number of toxic compounds invested into or nutrients taken up. Toxic compound coverage is calculated from the vector  $\tilde{f}_{\cdot k} = \sum_l \tilde{f}_{lk}$  of total investment into degrading toxic compound  $k$  in a given community. The ‘tilde’ indicates that we have scaled the  $f_{lk}$  for each strain of a species by the corresponding population sizes of the strains in the community

887 as in Eq. (2). In this way, we emphasize the most relevant 930  
888 strain of each species and do not bias the result to the number  
889 of competing strains within a species. Note that we do not 931  
890 scale  $\tilde{f}_{\cdot k}$  by species abundance in the community. Once each 932  
891 investment  $\tilde{f}_{\cdot k}$  is rescaled so that  $\sum_k \tilde{f}_{\cdot k} = 1$ , we calculate 933  
892 the effective number of toxic compounds invested into as 934  
935

$$\exp(H') = \exp\left(-\sum_{k=1} \tilde{f}_{\cdot k} \log \tilde{f}_{\cdot k}\right), \quad (15)$$

893 and average this value over all 21 communities. The measure 943  
894 falls between 0 (no toxic compounds are invested into) and 10 944  
895 (all compounds). For the nutrient coverage, we use the same 945  
896 calculation using the nutrient uptake rates  $n_{ij}$ , but without 946  
897 scaling between different strains as this parameter does not 947  
898 mutate. The effective number of nutrients taken up takes val- 948  
899 ues between 0 and 4, the number of different nutrients. 949

900 To evaluate the stability of the selection methods (Fig. 6A), 954  
901 we choose the highest-scoring community that each method 955  
902 found after 50 rounds of selection (one community for each 956  
903 repeated run of each species set), and seed 10 replicates with 957  
904 its identical initial composition. Then we grow and dilute 958  
905 them for a further 25 rounds, as we would do for the no- 959  
906 selection treatment. We do not allow mutations in these 960  
907 rounds, to focus only on the ecological stability of the found 961  
908 communities. For the analysis of sensitivity to the number of 962  
909 species in the initial species pool (Fig. 6C, Fig. S9), we sam- 963  
910 ple 5 random subsets of 6, 9, 12 from the original set of 15 964  
911 species, and run for each of them 5 simulations with differ- 965  
912 ent 21 initial communities. Drawing new species sets of the 966  
913 corresponding size would introduce further variance, which 967  
914 we would rather avoid. For the effect of the dilution factor 968  
915 (Fig. 6E, Fig. S11), we multiply the 10-cell inoculum by a 969  
916 factor 0.2, 0.5, 1, 2 or 5 for the disassembly method and scale 970  
917 the 5% dilution fraction for the other methods by the same 971  
918 factor. 972  
973  
974  
975  
976  
977  
978  
979  
980  
981  
982  
983  
984  
985  
986  
987  
988  
989  
990  
991  
992  
993  
994  
995  
996  
997  
998  
999  
1000

## 919 Contributions and acknowledgements

920 BV, FAS and SM conceived the project. PGF and BV devel- 986  
921 oped, implemented and simulated the models and selection. 987  
922 PGF and BV analyzed the data. BV wrote the first draft. BV, 988  
923 PGF and SM wrote the manuscript. FAS commented on the 989  
924 manuscript. BV, FAS, PGF and SM were funded by Euro- 990  
925 pean Research Council Starting Grant 715097, and SM by the 991  
926 NCCR Microbiomes (Swiss National Science Foundation). 992  
927 We thank the Mitri lab at the University of Lausanne for valu- 993  
928 able discussions, in particular Afra Salazar de Dios and Shota 994  
929 Shibasaki for detailed comments on the manuscript. 1000

## References

1. Frances H Arnold. Protein engineering for unusual environments. *Proc Natl Acad Sci USA*, 4:450–455, 1993.
2. Flor I. Arias-Sánchez, Björn Vessman, and Sara Mitri. Artificially selecting microbial communities: If we can breed dogs, why not microbiomes? *PLoS Biology*, 17(8):1–8, 2019.
3. Álvaro Sánchez, Jean C.C. Vila, Chang-Yu Chang, Juan Diaz-Colunga, Sylvie Estrela, and María Rebolledo-Gomez. Directed evolution of microbial communities. *Annual Review of Biophysics*, 50(1):null, 2021. PMID: 33646814.
4. C J Goodnight. Heritability at the ecosystem level. *Proceedings of the National Academy of Sciences of the United States of America*, 97(17):9365–6, 2000.
5. Hywel T. P. Williams and Timothy M. Lenton. Artificial ecosystem selection for evolutionary optimisation. In Fernando Almeida e Costa, Luis Mateus Rocha, Ernesto Costa, Inman Harvey, and António Coutinho, editors, *Advances in Artificial Life*, pages 93–102, Berlin, Heidelberg, 2007. .
6. Li Xie, Alex E. Yuan, and Wenying Shou. Simulations reveal challenges to artificial community selection and possible strategies for success. *PLOS Biology*, 17(6):e3000295, 2019.
7. Melanie Ghoul, Ashleigh S. Griffin, and Stuart A. West. Toward an Evolutionary Definition of Cheating. *Evolution*, 68(2):318–331, 2014.
8. W. Swenson, D. S. Wilson, and R. Elias. Artificial ecosystem selection. *Proceedings of the National Academy of Sciences*, 97(16):9110–9114, 2000.
9. William Swenson, Jeff Arendt, and David Sloan Wilson. Artificial selection of microbial ecosystems for 3-chloroaniline biodegradation. *Environmental Microbiology*, 2(5):564–571, 2000.
10. Tiffany Raynaud, Marion Devers, Aymé Spor, and Manuel Blouin. Effect of the Reproduction Method in an Artificial Selection Experiment at the Community Level. *Frontiers in Ecology and Evolution*, 7:416, 2019.
11. Samuel Jacquiod, Aymé Spor, Shaodong Wei, Victoria Munkager, David Bru, Søren J. Sørensen, Christophe Salou, Laurent Philippot, and Manuel Blouin. Artificial selection of stable rhizosphere microbiota leads to heritable plant phenotype changes. *Ecology Letters*, 25(1):189–201, 2022.
12. Michael D. Jochum, Kelsey L. McWilliams, Elizabeth A. Pierson, and Young Ki Jo. Host-mediated microbiome engineering (HMME) of drought tolerance in the wheat rhizosphere. *PLoS ONE*, 14(12):1–15, 2019.
13. Ulrich G Mueller, Thomas E Juenger, Melissa R Kardish, Alexis L Carlson, Kathleen M Burns, Joseph A Edwards, Chad C Smith, Chi-chun Fang, and L Des Marais. Artificial Selection on Microbiomes To Breed Microbiomes That Confer Salt Tolerance to Plants. *mSystems*, 2021.
14. Kevin Panke-Buisse, Angela C Poole, Julia K Goodrich, Ruth E Ley, and Jenny Kao-Kniffin. Selection on soil microbiomes reveals reproducible impacts on plant function. *The ISME Journal*, 9(4):980–989, 2015.
15. Kevin Panke-Buisse, Stacey Lee, and Jenny Kao-Kniffin. Cultivated Sub-Populations of Soil Microbiomes Retain Early Flowering Plant Trait. *Microbial Ecology*, 73(2):394–403, 2017.
16. Robyn J Wright, Matthew I Gibson, and Joseph A Christie-Oleza. Understanding microbial community dynamics to improve optimal microbiome selection. *Microbiome*, 7(1):85, 2019.
17. Jigyasa Arora, Margaret Mars Brisbin, and Alexander S. Mikhayev. Effects of microbial evolution dominate those of experimental host-mediated indirect selection. *PeerJ*, (8):e9350, 2020.
18. Manuel Blouin, Battle Karimi, Jérôme Mathieu, and Thomas Z. Lerch. Levels and limits in artificial selection of communities. *Ecology Letters*, 18(10):1040–1048, 2015.
19. Chang-Yu Chang, Melisa L. Osborne, Djordje Bajic, and Alvaro Sanchez. Artificially selecting bacterial communities using propagule strategies†. *Evolution*, 74(10):2392–2403, 2020.
20. U.G. Mueller and J.L. Sachs. Engineering Microbiomes to Improve Plant and Animal Health. *Trends in Microbiology*, 23(10):606–617, 2015.
21. Li Xie and Wenying Shou. Steering ecological-evolutionary dynamics to improve artificial selection of microbial communities. *Nature Communications*, (12):264697, 2021.
22. Guilhem Douclier, Amaury Lambert, Silvia De Monte, and Paul B Rainey. Eco-evolutionary dynamics of nested darwinian populations and the emergence of community-level heredity. *eLife*, 9:e53433, 2020.
23. Chang-Yu Chang, Jean C. C. Vila, Madeline Bender, Richard Li, Madeleine C. Mankowski, Molly Bassette, Julia Borden, Stefan Golfier, Paul Gerald L. Sanchez, Rachel Waymack, Xinwen Zhu, Juan Diaz-Colunga, Sylvie Estrela, Maria Rebolledo-Gomez, and Alvaro Sanchez. Engineering complex communities by directed evolution. *Nature Ecology Evolution* 2021 5:7, 5(7):1011–1023, 2021.
24. M. Slatkin and M. J. Wade. Group selection on a quantitative character. *Proceedings of the National Academy of Sciences of the United States of America*, 75(7):3531–3534, 1978.
25. Philippe Piccardi, Björn Vessman, and Sara Mitri. Toxicity drives facilitation between 4 bacterial species. *Proceedings of the National Academy of Sciences*, 116(32):15979–15984, 2019.
26. Michael J Wade. An Experimental Study of Group Selection. *Evolution*, 31(1):134–153, 1977.

- 1001 27. Alexander Lalejini, Emily Dolson, Anya E Vostinar, and Luis Zaman. Artificial selection meth-  
1002 ods from evolutionary computing show promise for directed evolution of microbes. *eLife*, 11,  
1003 2022.
- 1004 28. Melanie Mitchell. *An Introduction to Genetic Algorithms*. MIT Press, Cambridge, MA, USA,  
1005 .
- 1006 29. John H. Holland. *Adaptation in Natural and Artificial Systems*. University of Michigan Press,  
1007 Ann Arbor, MI, USA, .
- 1008 30. Sarah P. Otto and Thomas Lenormand. Resolving the paradox of sex and recombination.  
1009 *Nature Reviews Genetics* 2002 3:4, 3(4):252–261, 2002.
- 1010 31. J. Arjan G.M. De Visser and Santiago F. Elena. The evolution of sex: empirical insights into  
1011 the roles of epistasis and drift. *Nature Reviews Genetics* 2007 8:2, 8(2):139–149, 2007.
- 1012 32. R. C. Lewontin. The Units of Selection. *Annual Review of Ecology and Systematics*, 1(1):  
1013 1–18, 1970.
- 1014 33. Manoshi S Datta, Elzbieta Sliwerska, Jeff Gore, Martin F Polz, and Otto X Cordero. Micro-  
1015 bial interactions lead to rapid micro-scale successions on model marine particles. *Nature*  
1016 *Communications*, 7(1):11965, 2016.
- 1017 34. Jose Alvarez-Ramirez, M. Meraz, and E. Jaime Vernon-Carter. A theoretical derivation of  
1018 the monod equation with a kinetics sense. *Biochemical Engineering Journal*, 150:107305,  
1019 2019.
- 1020 35. Ernst Hairer, Syvert P. Norsett, and Gerhard Wanner. *Solving Ordinary Differential Equations i. Nonstiff Problems.*, volume 8 of *Springer Series in Computational Mathematics*.  
1021 Springer-Verlag, 2 edition, .
- 1022 36. Eric Jones, Travis Oliphant, Pearu Peterson, et al. SciPy: Open source scientific tools for  
1023 Python. [Online; accessed 2019-10-21].
- 1024 37. Alexandra S Penn and Inman Harvey. The role of non-genetic change in the heritability,  
1025 variation and response to selection of artificially selected ecosystems. 2004.
- 1026 38. Tiffany Raynaud, Marion Devers-Lamrani, Aymé Spor, and Manuel Blouin. Community di-  
1027 versity determines the evolution of synthetic bacterial communities under artificial selection.  
1028 *Evolution*, 76(8):1883–1895, 2022.
- 1029 39. M. O. Hill. Diversity and Evenness: A Unifying Notation and Its Consequences. *Ecology*,  
1030 54(2):427–432, 1973.
- 1031 40. Anne Chao, Chun-Huo Chiu, Lou Jost, A Chao, C.-H Chiu, and L Jost. Phylogenetic Diver-  
1032 sity Measures and Their Decomposition: A Framework Based on Hill Numbers. *Topics in*  
1033 *Biodiversity and Conservation*, 14:141–172, 2016.
- 1034

DRAFT



1035 **Supplementary tables**

| Method 1 | Method 2    | $p$ (IBM)           | $p$ (ODE)           |
|----------|-------------|---------------------|---------------------|
| DS       | $\emptyset$ | $4 \times 10^{-10}$ | $4 \times 10^{-10}$ |
| DS       | PS          | $8 \times 10^{-10}$ | $8 \times 10^{-10}$ |
| DS       | MS          | $8 \times 10^{-10}$ | -                   |
| DS       | PIS         | $1 \times 10^{-9}$  | $2 \times 10^{-8}$  |
| DS       | MIS         | $8 \times 10^{-10}$ | -                   |
| DS       | DR          | $8 \times 10^{-10}$ | $8 \times 10^{-10}$ |
| DS       | NS          | $8 \times 10^{-10}$ | $8 \times 10^{-10}$ |
| PS       | $\emptyset$ | 1.0                 | 1.0                 |
| PS       | MS          | $1 \times 10^{-7}$  | -                   |
| PS       | PIS         | $4 \times 10^{-9}$  | $7 \times 10^{-5}$  |
| PS       | PR          | $8 \times 10^{-10}$ | $3 \times 10^{-9}$  |
| PS       | NS          | $8 \times 10^{-10}$ | 0.1                 |
| MS       | $\emptyset$ | 1.0                 | -                   |
| MS       | MIS         | 0.67                | -                   |
| MS       | MR          | $8 \times 10^{-10}$ | -                   |
| MS       | NS          | 0.3                 | -                   |
| PIS      | $\emptyset$ | $9 \times 10^{-6}$  | 0.8                 |
| MIS      | $\emptyset$ | 1.0                 | -                   |

**Table S1.** P-values for Fig.2A-D a Wilcoxon signed-rank test of difference in maximum degradation between methods.

| Method 1 | Method 2 | $p$ (IBM)           | $p$ (ODE)           |
|----------|----------|---------------------|---------------------|
| DS       | PS       | $8 \times 10^{-10}$ | $7 \times 10^{-10}$ |
| DS       | MS       | $8 \times 10^{-10}$ | -                   |
| DS       | PIS      | $8 \times 10^{-10}$ | $7 \times 10^{-10}$ |
| DS       | MIS      | $8 \times 10^{-10}$ | -                   |
| DS       | DR       | $8 \times 10^{-10}$ | $8 \times 10^{-10}$ |
| DS       | NS       | $8 \times 10^{-10}$ | $7 \times 10^{-10}$ |
| PS       | MS       | $1 \times 10^{-4}$  | -                   |
| PS       | PIS      | $3 \times 10^{-8}$  | $7 \times 10^{-4}$  |
| PS       | PR       | $2 \times 10^{-9}$  | $7 \times 10^{-7}$  |
| PS       | NS       | $8 \times 10^{-10}$ | $3 \times 10^{-6}$  |
| MS       | MIS      | $8 \times 10^{-2}$  | -                   |
| MS       | MR       | $2 \times 10^{-8}$  | -                   |
| MS       | NS       | $2 \times 10^{-9}$  | -                   |

**Table S2.** P-values for Fig.2E-H a Wilcoxon signed-rank test of difference in degradation ranks between methods.

| Method 1 | Method 2 | $p$ (IBM)           | $p$ (ODE)           |
|----------|----------|---------------------|---------------------|
| DS       | PS       | $6 \times 10^{-9}$  | $8 \times 10^{-10}$ |
| DS       | MS       | $8 \times 10^{-10}$ | -                   |
| DS       | PIS      | $8 \times 10^{-10}$ | $8 \times 10^{-10}$ |
| DS       | MIS      | $8 \times 10^{-10}$ | -                   |
| DS       | DR       | $8 \times 10^{-10}$ | $6 \times 10^{-4}$  |
| DS       | NS       | $8 \times 10^{-10}$ | $8 \times 10^{-10}$ |
| PS       | MS       | $1 \times 10^{-9}$  | -                   |
| PS       | PIS      | 0.1                 | 0.01                |
| PS       | PR       | $2 \times 10^{-8}$  | 0.5                 |
| PS       | NS       | $8 \times 10^{-10}$ | 0.3                 |
| MS       | MIS      | 0.13                | -                   |
| MS       | MR       | $1 \times 10^{-9}$  | -                   |
| MS       | NS       | $1 \times 10^{-5}$  | -                   |

**Table S3.** P-values from a Wilcoxon signed-rank test of difference in total investment in communities, between methods for Fig.3A-D.

1036 **Supplementary figures**

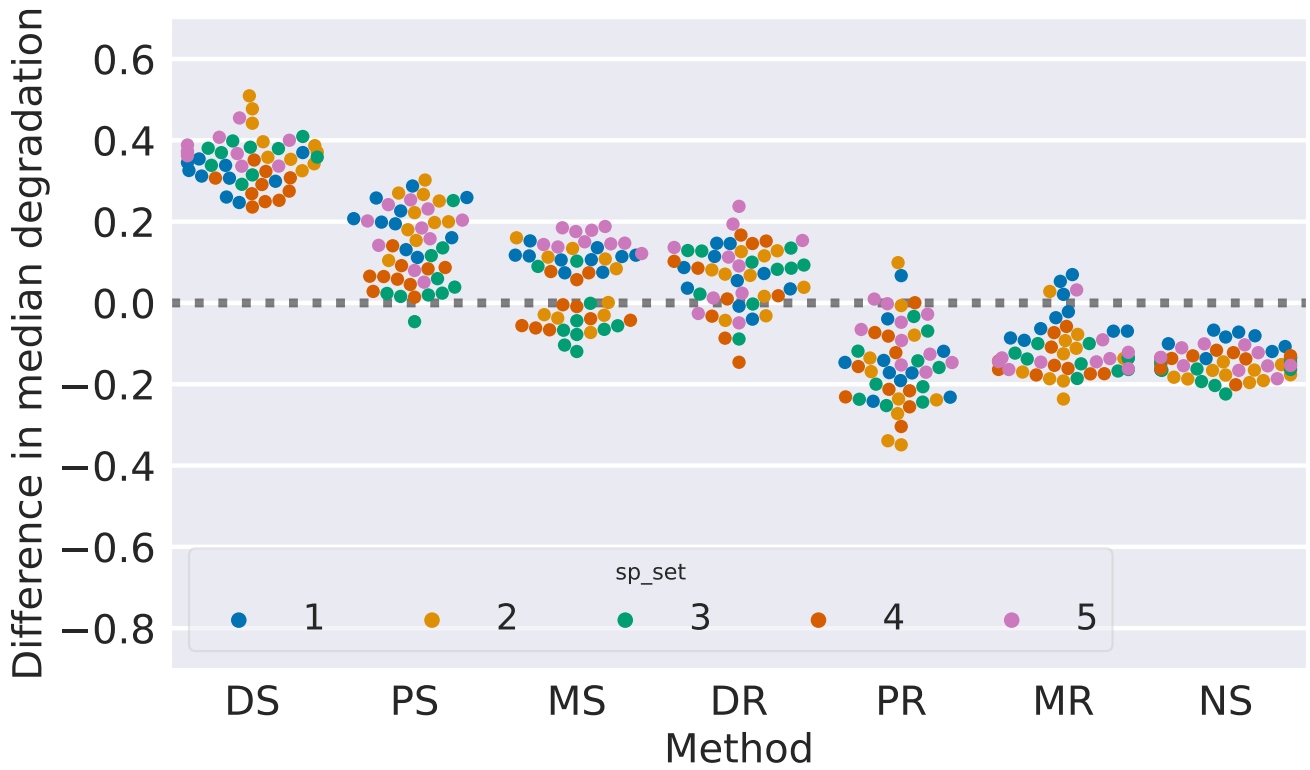

**Fig. S1.** The difference in median degradation between round 50 and round 0 for each propagation method, corresponding to Fig. 2. The two-sided Wilcoxon test for difference in degradation against the no-selection control is significant for the selection methods DS, PS and MS. Data generated by the IBM.

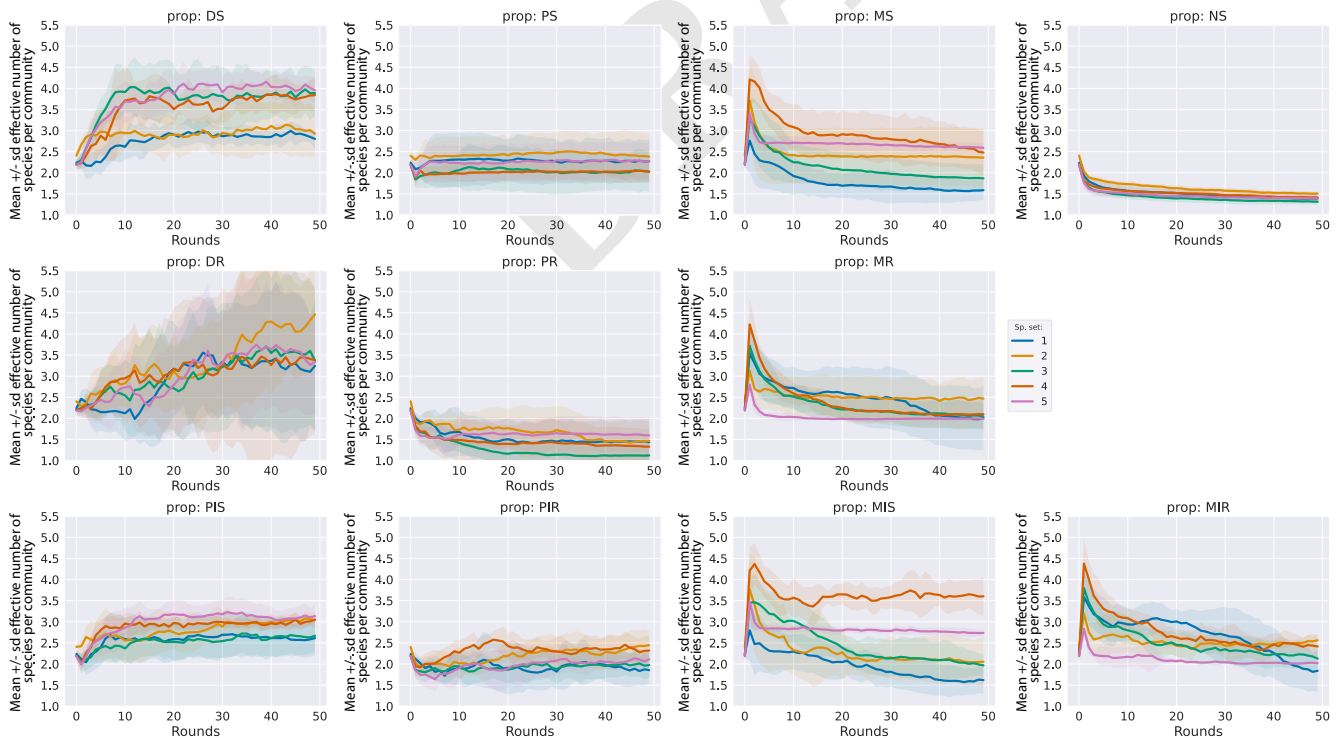

**Fig. S2.** Time-series of the species diversity (effective number of species per community) corresponding to Fig. 4D. Each panel shows the mean  $\pm$  standard deviation over the 10 repeated runs, for each species set 1-5, for one propagation method. Data generated by the IBM.

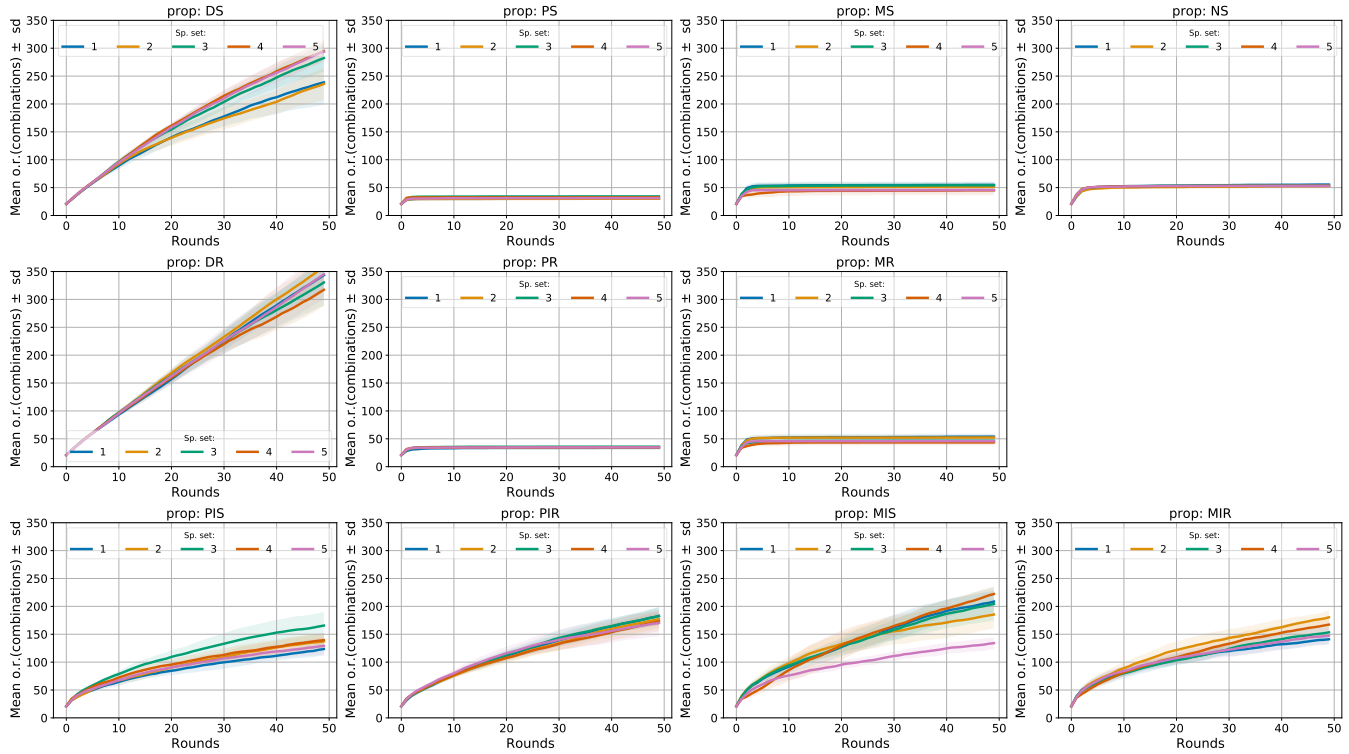

**Fig. S3.** Time-series of the number of explored communities, corresponding to Fig. 4B. Each panel shows the mean  $\pm$  standard deviation over the 10 repeated runs, for each species set 1-5, for one propagation method. Data generated by the IBM.

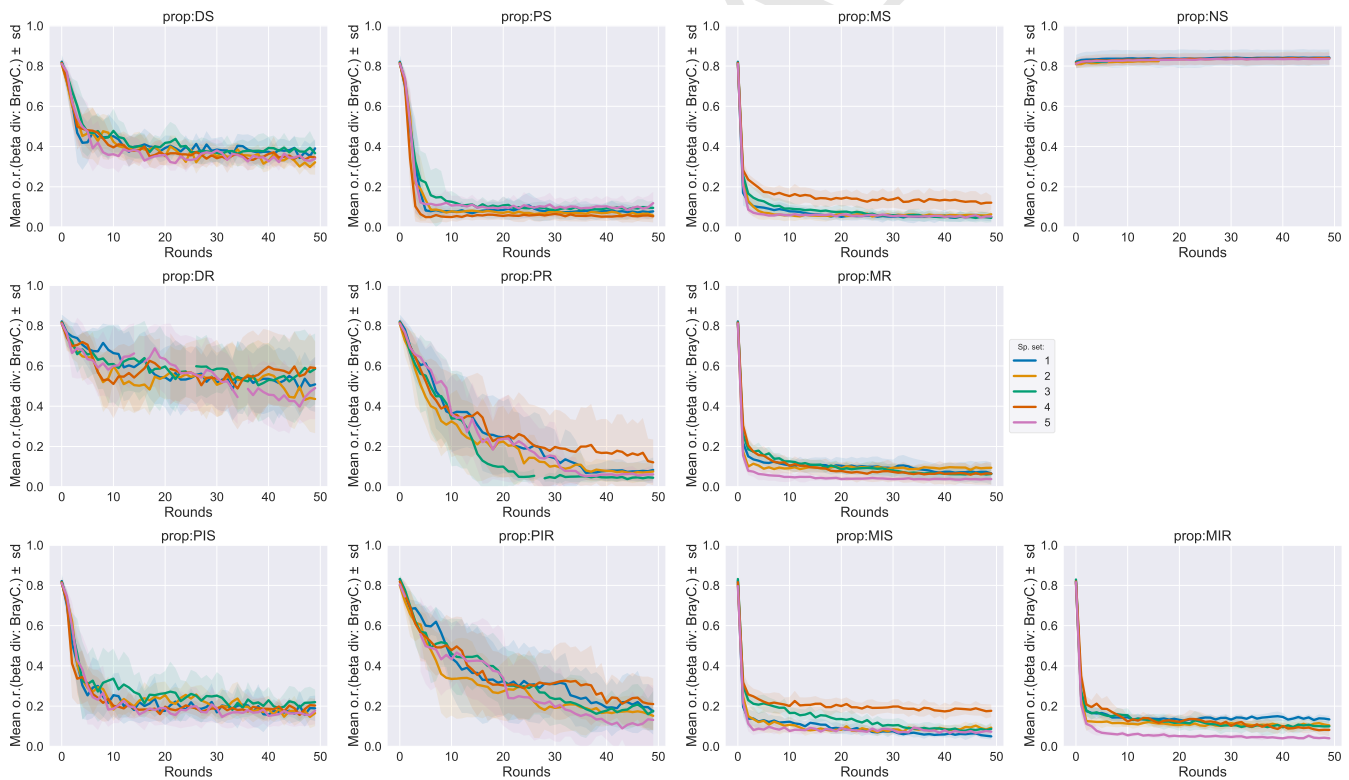

**Fig. S4.** Time-series of the beta diversity corresponding to Fig. 4F. Each panel shows the mean  $\pm$  standard deviation over the 10 repeated runs, for each species set 1-5, for one propagation method. Data generated by the IBM.

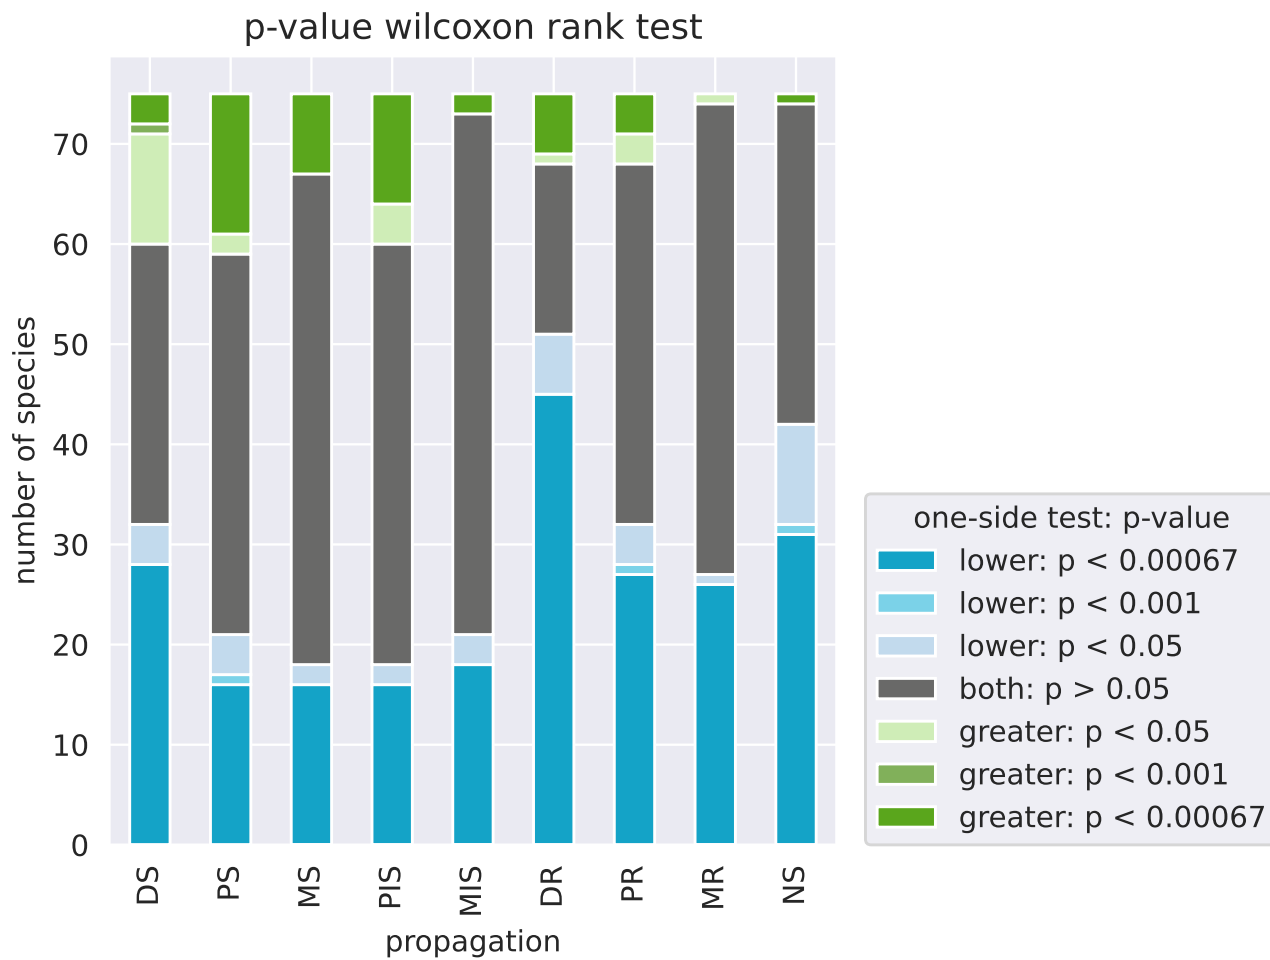

**Fig. S5.** Distribution of p-values from a one-sided Wilcoxon signed-rank test of whether the total investment  $f_i$  of a species is larger/smaller in the last round where a species survived, than the investment of the ancestral species. There is one bar for each selection method, with 15 species  $\times$  5 sets of species for each bar. The alternative hypothesis is that difference in investment (ancestral-evolved) is greater (green) or less (blue) than zero. Data generated by the IBM. Data for DS is shown in Fig. 5.

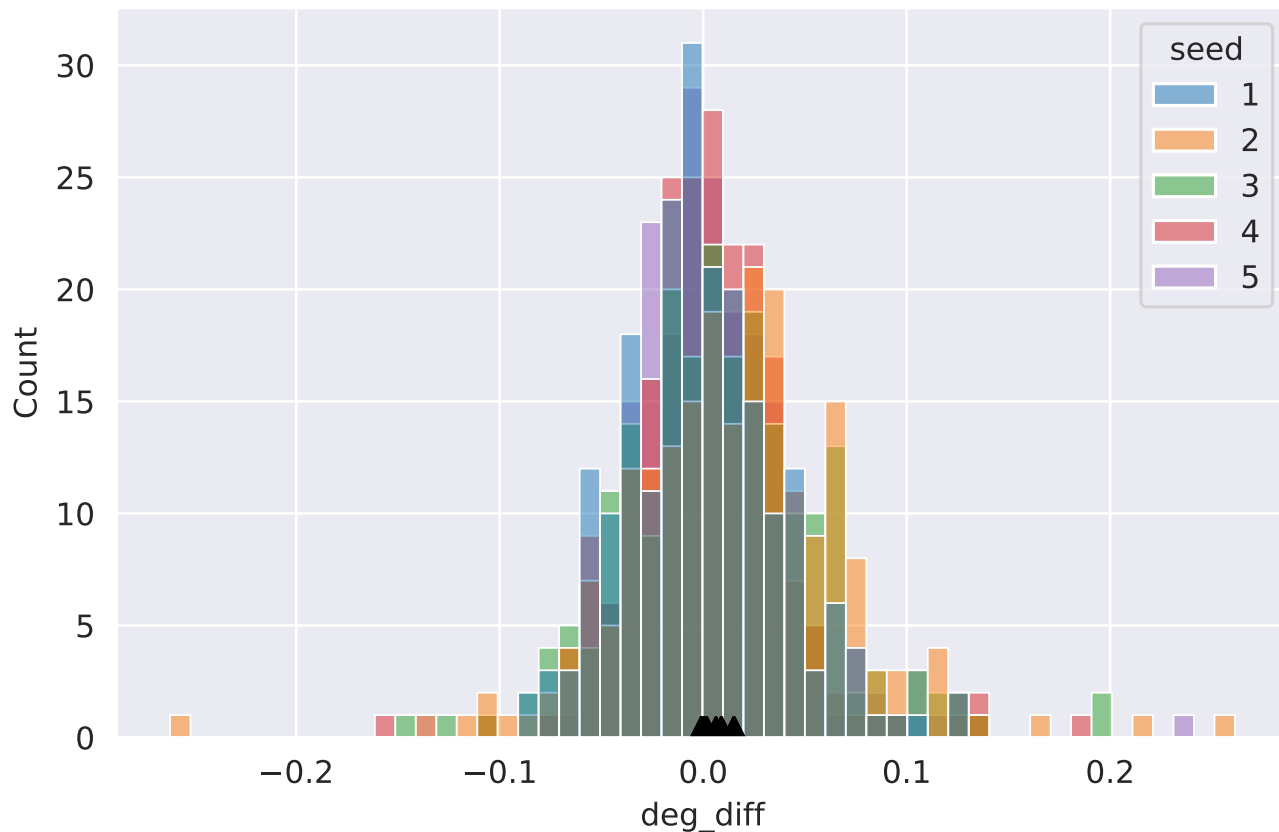

**Fig. S6.** Histogram of difference in max degradation between evolved and ancestral communities. Triangles indicate the mean values for each species set. Data generated by the IBM.

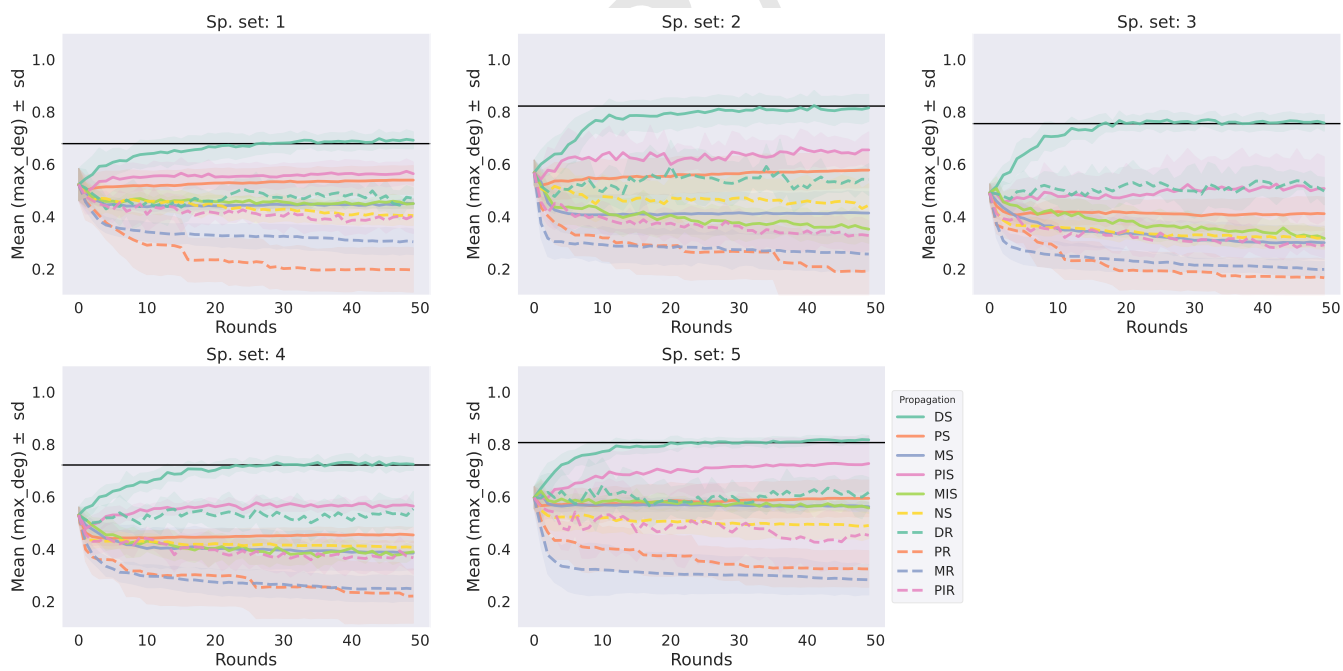

**Fig. S7.** Time-series of max. degradation over 50 rounds of selection, for the different propagation methods. Each plot corresponds to one species set and shows the maximum degradation in the meta-community averaged over repeats, with the standard deviation in shades of the corresponding color. For each species set, each repeat etc, the degradation score at transfer 50 forms the swarms in Fig. 2. The black line shows the degradation score of the best ancestral community out of the 32767 combinations. Data generated by the IBM.

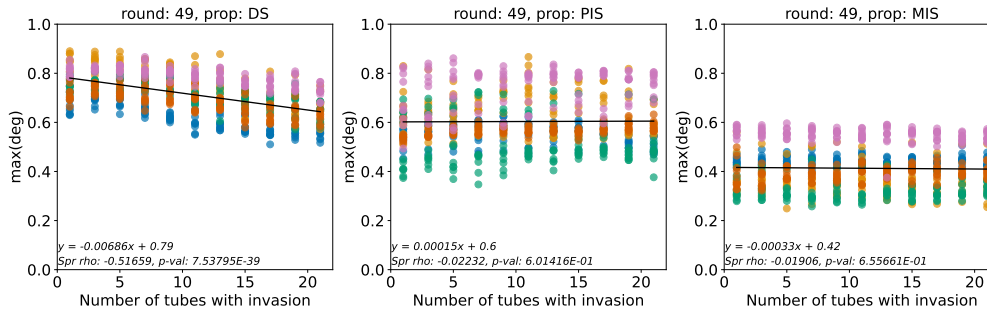

**Fig. S8.** Effect on max community degradation score from changing the number of communities to receive a migrating species. Data generated by the IBM.

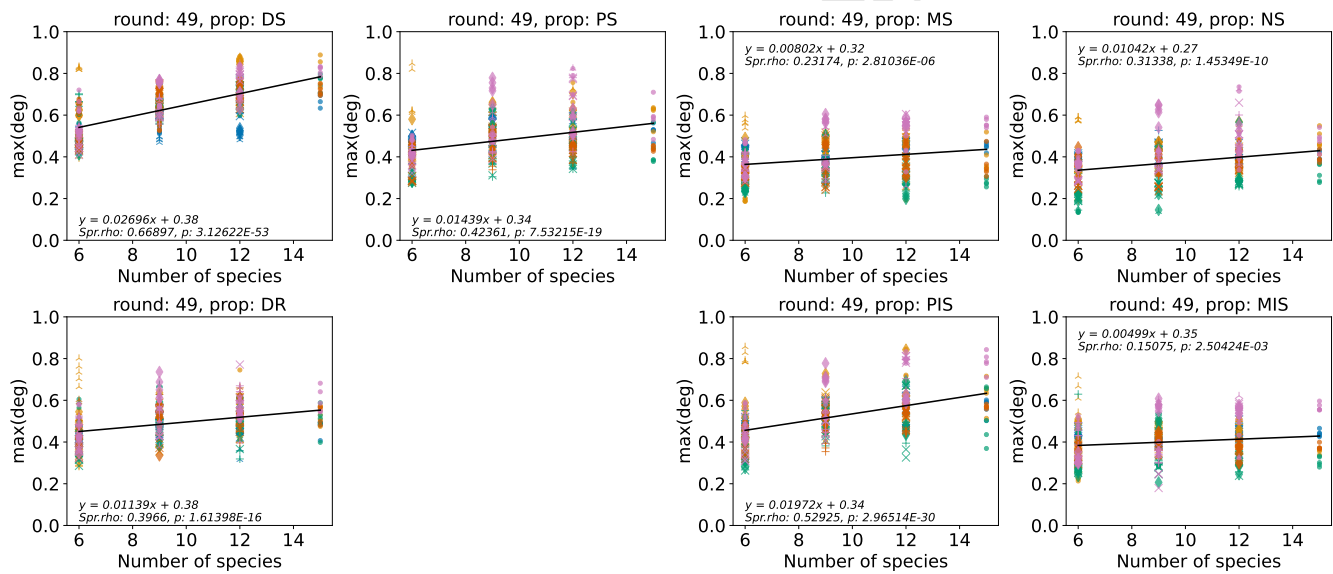

**Fig. S9.** Effect on max community degradation score from changing the number of species in the ancestral community. Different marker shape indicates sub-sample (1-5) for each species group of size 6, 9, 12. For 15 species we keep the original species sets. Data generated by the IBM.

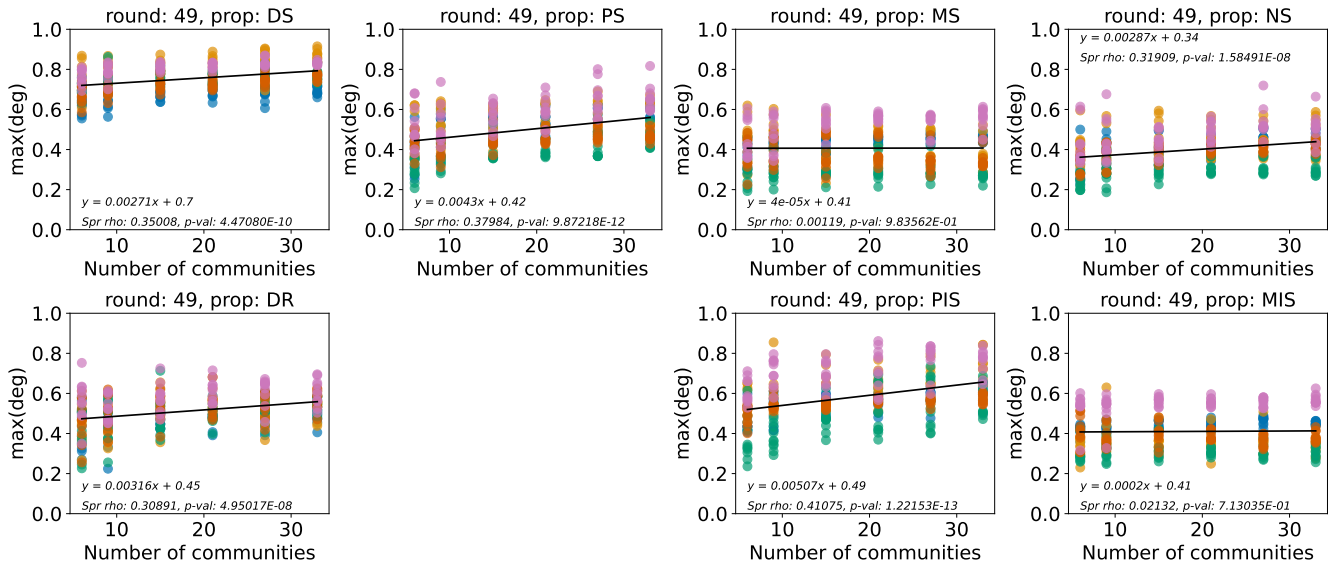

**Fig. S10.** Effect on max community degradation score from changing the number of communities. Data generated by the IBM.

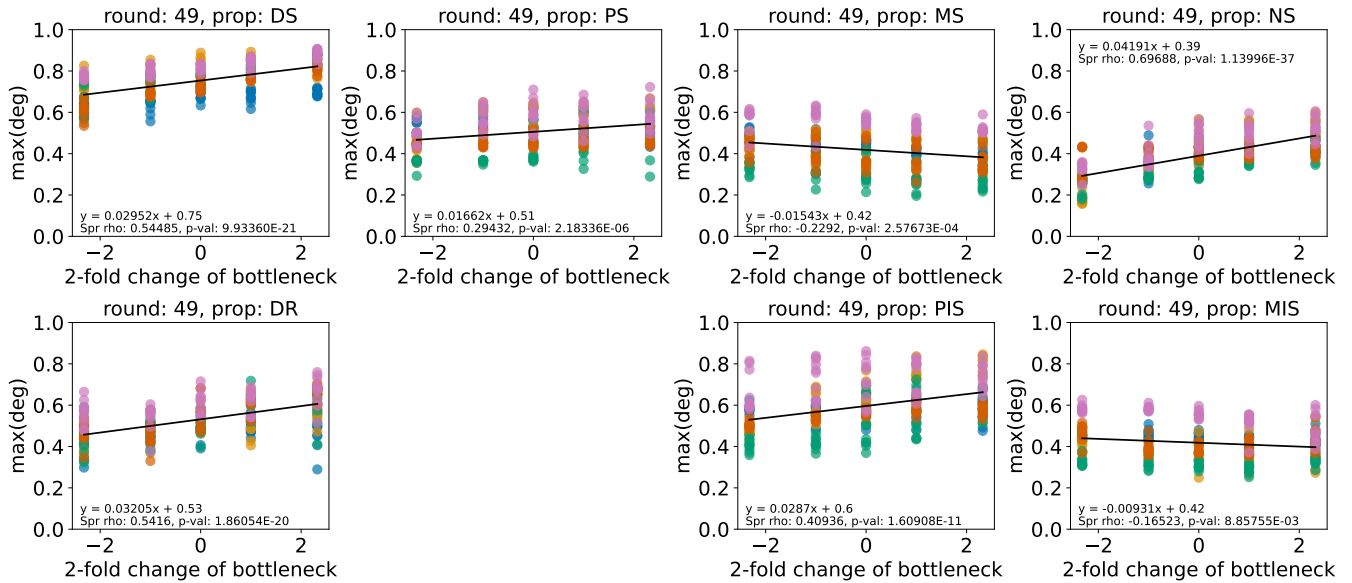

**Fig. S11.** Effect on max community degradation score from scaling the dilution factor or inoculum size. Data generated by the IBM.



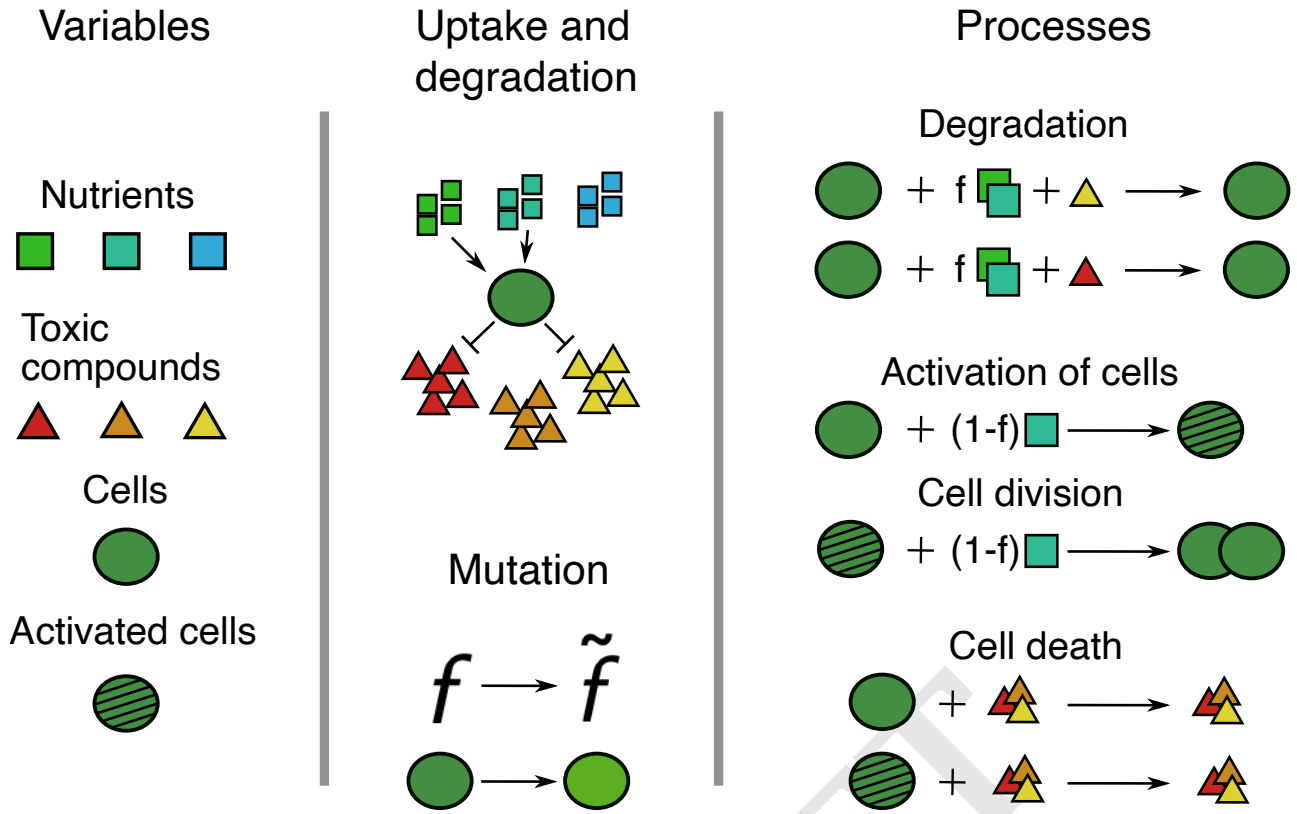

**Fig. S12.** Illustration of the variables and processes in the individual-based model. Cells of a certain species vary in their preferences for nutrients and degradation capabilities. Cells use the available nutrients to degrade the toxic compounds and for cell division.

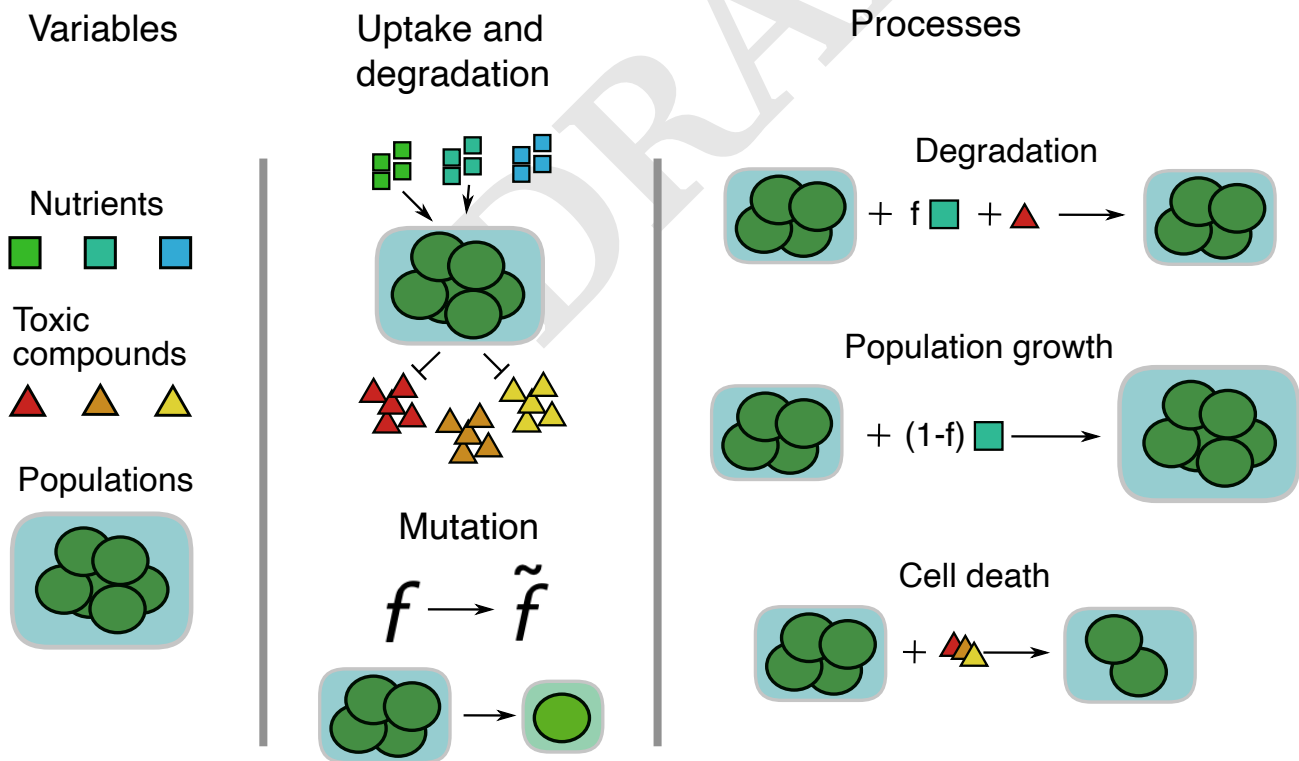

**Fig. S13.** Illustration of the variables and processes in the ODE model. Populations of cells vary in their preferences for nutrients and degradation capabilities. The populations use the available nutrients to degrade the toxic compounds and to grow.

## Pseudo-code for implementation of models and selection methods

**Input:** A set of 15 species, defined by model parameters.

**Input:** Experimental parameters: Number of communities, time span  $[t_0, t_{end}]$  of growth in batch. Community bottleneck  $\beta = 1/3$ , dilution ratio  $d \in [0, 1]$ . Initial conditions  $S_i(t_0), N_j(t_0), T_k(t_0)$ .

Assemble 21 communities by randomly drawing 4 species with replacement from the species set. Ensure that each species is present in at least one initial community.

**for** Each round of selection **do**

    // *Population growth, interspecies competition and invasion of mutants*

**for** Each community **do**

        Grow the communities for a time span  $[t_0, t_{end}]$ . (IBM implementation: Alg. 2, ODE implementation: Alg. 6).

        Save the population sizes  $S_i(t_{end})$  for each strain  $i$  in the community

        Save the end-state concentrations  $T_k(t_{end})$  for each toxic compound  $k$

        Compute the degradation score  $D$  from  $T_k(t_{end})$  by Eq. (1)

**end**

    // **Propagate the communities by the chosen selection method**

    // Required parameters: the community bottleneck  $\beta$ , dilution ratio  $d$

    // Required variables: degradation scores  $D$  for each community

    // *For propagule method, follow Algs. 7 and 8*

    // *For migrant pool method, IBM only, follow Alg. 9*

    // *For disassembly method, follow Alg. 10*

    // **Replenish the substrates**

    Set  $N_j(t_0) = N_0$  and  $T_k(t_0) = T_0$  for all  $j, k$

**end**

**Algorithm 1:** Overall flow of the selection simulations from population growth, community dynamics and mutations to propagation by the different selection methods.

DRAFT

**Input:** A community where each microbial strain  $i$  is defined by the parameters in Tab. 1. Size of the inactive and active sub-populations  $p_{i0}$ ,  $p_{i1}$  and total population size  $S_i = p_{i0} + p_{i1}$ . Nutrient concentrations  $N_j$ , toxic compound concentrations  $T_k$ .

**Input:** Mutation parameters: mutation rate  $\mu_{mut}$ , trait deviation  $\sigma_m$ .

**for** Each time step **do**

**for** Each community 1, ..., 21 **do**

**for** Each strain  $i$  **do**

*// Maximum uptake of nutrients of this strain, used to scale the growth and degradation according to the concentration of nutrients*

$max\_uptake := \sum_j (n_{ij} \text{ if } N_j > n_{ij})$

*// If some nutrients are depleted we re-scale  $n_{ij}$  to consume the remaining nutrients in higher amounts*

**if**  $N_j < n_{ij}$  **then**

|  $n_{ij} := 0$

**end**

$\hat{n}_{ij} := \frac{n_{ij}}{\sum_j (n_{ij} \text{ if } N_j > n_{ij})}$

*// The largest number of cells that can consume the scarcest nutrient at this time step, we just take its integer part*

$S_i^{max} := \text{int}(\min(N_j / \hat{n}_{ij} \text{ if } N_j > \hat{n}_{ij}))$

*// Toxic compound degradation*

**if**  $S_i^{max} > 0$  **then**

*// Maximal population that can degrade*

$P_{i,tot} := \min(S_i^{max}, S_i)$

**for** Each compound  $T_k$  **do**

**if**  $T_k$  cannot be completely degraded in this time step **then**

|  $T_k := T_k - P_{i,tot} \cdot max\_uptake \cdot f_{ik}$

**for** Each nutrient  $N_j$  **do**

|  $N_j := N_j - \hat{n}_{ij} \cdot P_{i,tot} \cdot f_{ik}$

**end**

**end**

**else**

| Degrade the remaining toxic compounds and consume the corresponding nutrients

**end**

**end**

**end**

*// Cell division step 1: Costly activation*

Alg. 3.

**end**

**end**

*// Cell division step 2: Replication*

Alg. 4.

*// Cell death*

Alg. 5.

**end**

**Algorithm 2:** Implementation of population growth, competition and mutations in the IBM model described in the section *Individual-based model*.

**Input:** Communities where each strain  $i$  is defined by parameters in Tab. 1. Inactive and active sub-populations  $p_{i0}, p_{i1}$ . The maximal population  $S_i^{max}$  that can afford to consume nutrients, based on their current availability. Re-scaled nutrient consumption rates  $\hat{n}_{ij}$ . Current nutrient concentrations  $N_j$ .

**Input:** Parameters: Initial nutrient concentration  $N_0$ .

// Cell activation

if  $S_i^{max} > 0$  then

    // Already activated cells consume nutrients

    if  $S_i^{max} \geq p_{i1}$  then

$N_j := N_j - \hat{n}_{ij} \cdot p_{i1} \cdot (1 - \sum_k f_{ik})$

$S_i^{max} := S_i^{max} - p_{i1}$

    end

    else

        Deactivate cells that cannot afford to stay activated, consume the corresponding nutrients for cells that remain activated, set  $S_i^{max} := 0$

    end

    // Newly activated cells

$cells\_activate := \text{Poisson}(a_i \cdot p_{i0} \cdot max\_uptake \cdot (1 - \sum_k f_{ik}) \cdot \sum_j (\hat{n}_{ij} \cdot N_j / N_0))$

    if  $cells\_activate > p_{i0}$  then

$cells\_activate := p_{i0}$

    end

    if  $cells\_activate > S_i^{max}$  then

$cells\_activate := S_i^{max}$

    end

$p_{i0} := p_{i0} - cells\_activate$

$p_{i1} := p_{i1} + cells\_activate$

    for Each nutrient  $N_j$  do

$N_j := N_j - \hat{n}_{ij} \cdot cells\_activate \cdot (1 - \sum_k f_{ik})$

    end

end

else

    Deactivate all the activated cells

end

return Populations  $p_{i0}, p_{i1}$  for strain  $i$ , current nutrient concentrations  $N_j$

**Algorithm 3:** Activation of cells, the first step of cell division in the IBM described in Alg. 2.

**Input:** Communities where each strain  $i$  is defined by parameters in Tab. 1. Inactive and active sub-populations  $p_{i0}, p_{i1}$ .

**for** Each community **do**

**for** Each strain  $i$  in the community **do**

*// Calculate the number of new cells appearing due to division*

$new\_cells := \text{Poisson}(p_{i1} \cdot r_i \cdot (1 - \sum_k f_{ik}))$

**if**  $new\_cells > p_{i1}$  **then**

|  $new\_cells := p_{i1}$

**end**

*// Calculate how many new\_cells will carry mutations*

$mutants := \text{Poisson}(new\_cells \cdot \mu_{mut})$

**if**  $mutants > new\_cells$  **then**

|  $mutants := new\_cells$

**end**

$p_{i1} := p_{i1} - new\_cells$

$p_{i0} := p_{i0} + new\_cells \cdot 2 - mutants$

*//Mutation*

**for** Each new mutant **do**

Add a new strain  $i$  to the community, with the model parameters of the ancestor and set  $p_{i0} := 1$  and  $p_{i1} := 0$

Decide which  $f_{ik}$  to mutate by drawing from Bernoulli  $\left(\frac{1}{N_{tox}}\right)$  for each  $f_{ik}$ ; ensure that at least one  $f_{ik}$  mutates

**for** Each successful draw **do**

| Multiply the chosen  $f_{ik}$ , by a factor  $x \sim \text{lognormal}(0.0, \sigma_m)$

| Re-scale so  $\sum_k f_{ik} \leq 1$ , if needed

**end**

**end**

**end**

**end**

**return** Populations  $p_{i0}, p_{i1}$  for each strain  $i$ , including the new ones resulted from mutation.

**Algorithm 4:** Replication and mutation, second step of cell division of the IBM described in Alg. 2.

**Input:** Communities where each strain  $i$  is defined by parameters in Tab. 1. Inactive and active sub-populations  $p_{i0}, p_{i1}$ .

Current concentrations  $T_k$  of toxic compounds. Death rates  $m_{ik}$  and  $K$  constant for the Hill function.

**for** Each community **do**

**for** Each strain  $i$ , looping over the community in reverse order **do**

$p_{i0} := p_{i0} - \text{Poisson}\left(p_{i0} \cdot \sum_k (m_{ik} \cdot \frac{T_k^2}{T_k^2 + K^2})\right)$ ; ensure that  $p_{i0} \geq 0$

$p_{i1} := p_{i1} - \text{Poisson}\left(p_{i1} \cdot \sum_k (m_{ik} \cdot \frac{T_k^2}{T_k^2 + K^2})\right)$ ; ensure that  $p_{i1} \geq 0$

**if**  $p_{i0} + p_{i1} = 0$  **then**

| remove strain  $i$  from the community

**end**

**end**

Randomly shuffle strains in community

**end**

**return** Populations  $p_{i0}, p_{i1}$  for each strain  $i$ .

**Algorithm 5:** Cell death of the IBM described in Alg. 2.

**Input:** Strains with model parameters from 2 for each population  $i$ .

**Input:** Mutation parameters: rate  $\mu_{mut}$ , trait deviation  $\sigma_m$ .

**Input:** Experimental parameters: Number of toxic compounds  $N_{tox}$ , initial concentrations  $N_0, T_0$  of nutrients and toxic compounds, initial population size  $S_0$ . Time span for growth  $[t_0, t_{end}]$

**for** Each community **do**

    // Growth and competition within one round

    Solve the equations Eq. (6)–Eq. (8) for a time span  $[t_0, t_{end}]$ .

    Save the end states  $S_i(t_{end}), N_j(t_{end}), T_k(t_{end})$ .

    // Mutations, ODE model

**for** Each strain  $i$ , with probability  $\mu_{mut}$  **do**

        Copy the species parameters to an empty place in the list of populations

        Choose a  $f_{ik}$  at random by drawing from Bernoulli( $1/N_{tox}$ ) for each  $k = 1, \dots, 10$

        For each chosen  $f_{ik}$ , multiply by a factor  $x_k \sim \text{lognormal}(0.0, \sigma_m)$

        Set the inoculum size to  $S_0$

**end**

**end**

**return**  $S_i(t_{end}), N_j(t_{end}), T_k(t_{end}), f_{ik}$

**Algorithm 6:** Implementation of population growth, competition and mutations in the ODE model described in the section *Population-level model*. To solve the equations, we use *dopri5* from the SciPy library (35, 36).

**Input:** Communities with populations  $S_i$  and degradation scores  $D$ . End states  $T_k(t_{end})$ .

**Input:** Experimental parameters: selection bottleneck  $\beta = 1/3$ , dilution ratio  $d$ .

Rank the communities by degradation  $D$

Select the top  $N_\beta = 7$  of communities with the highest ranks.

// Re-populate the new set of tubes

Allocate  $1/\beta$  new tubes for each selected community

**for** Each selected community 1, 2, ..., 7 **do**

**for** Each population  $S_i$  in the selected community **do**

        // Dilute the population

        Dilute  $S_i(t_0) := d \cdot S_i(t_{end})$

**if**  $S_i(t_0) < 1.0$  **then**

            // The population is extinct

            Set  $S_i(t_0) := 0.0$

            Remove all species parameters from the community

**end**

        Copy model parameters and population sizes  $S_i(t_0)$  of each strain in the parent communities to each of the  $1/\beta$  offspring communities

**end**

**end**

**Algorithm 7:** Implementation of the propagule selection method for the ODE model.

**Input:** Communities with degradation scores  $D$  and strains  $S_i$  with total population  $S_i = p_{i0} + p_{i1}$ . End-state concentration of toxic compounds  $T_k(t_{end})$ .

**Input:** Experimental parameters: selection bottleneck  $\beta = 1/3$ , dilution ratio  $d$ .

Rank the communities by  $D$

Select the top  $N_\beta = 7$  of communities with the highest ranks

*// Re-populate the new set of tubes*

Allocate  $1/\beta$  new tubes for each selected community

**for** Each selected community 1, 2, ..., 7 **do**

**for** Each strain  $i$  in the community **do**

*// Deactivate cells*

$p_{i0}(t_{end}) = S_i(t_{end})$

$p_{i1}(t_{end}) = 0$

*// Dilute the population, new cells will be inactivated*

$p_{i0}(t_0) := \text{Poisson}(d \cdot S_i(t_{end}))$

**if**  $p_{i0}(t_0) > S_i(t_{end})$  **then**

$p_{i0}(t_0) = S_i(t_{end})$

**end**

**if**  $p_{i0}(t_0) > 0$  **then**

      Append strain  $i$  with population  $p_0(t_0)$  to the new tube

**end**

*// Delete selected cells to not chose them again*

$S_i(t_{end}) = S_i(t_{end}) - p_{i0}(t_0)$

**end**

**end**

**Algorithm 8:** Implementation of the propagule selection method for the IBM.

**Input:** Communities with degradation scores  $D$  and strains  $S_i$  with total population  $S_i = p_{i0} + p_{i1}$ . End-state concentration of toxic compounds  $T_k(t_{end})$ .

**Input:** Experimental parameters: selection bottleneck  $\beta = 1/3$ , dilution ratio  $d$ .

Rank the communities by  $D$

Select the top  $N_\beta = 7$  communities with the highest ranks, and pool their populations.

*// Re-populate the new set of tubes*

Allocate 21 new tubes

**for** Each offspring community 1, 2, ..., 21 **do**

**for** Each strain  $i$  in the pool **do**

*// Deactivate cells*

$p_{i0}(t_{end}) = S_i(t_{end})$

$p_{i1}(t_{end}) = 0$

*// Dilute the population, new cells will be inactivated*

        Draw  $p_{i0}(t_0)$  from Poisson ( $\frac{d}{N_\beta} \cdot S_i(t_{end})$ )

**if**  $p_{i0}(t_0) > S_i(t_{end})$  **then**

            |  $p_{i0}(t_0) = S_i(t_{end})$

**end**

**if**  $p_{i0}(t_0) > 0$  **then**

            | Append strain  $i$  with population  $p_{i0}(t_0)$  to the new tube

**end**

*// Delete selected cells to not chose them again*

$S_i(t_{end}) = S_i(t_{end}) - p_{i0}(t_0)$

**end**

**end**

**Algorithm 9:** Implementation of the migrant pool selection method for the IBM



**Input:** Communities with populations  $S_i$  (in the IBM  $S_i = p_{i0} + p_{i1}$ ) with model parameters from (Tab. 1, Tab. 2) and degradation scores  $D$ .

**Input:** Experimental parameters: selection bottleneck  $\beta = 1/3$ , initial population size  $S_0$  and number of new communities to emigrate species from  $N_{emi} = 5$ , and immigrate species to  $N_{immi} = 5$ .

*// Rank the communities*

Rank the communities by the degradation score  $D$

*// Update the fossil record with the top communities in this round*

**for** Each selected community 1, 2, ..., 7 **do**

**for** Each species  $l$  in the selected community **do**

**if** The record of species  $l$  is not yet updated in this round of selection **then**

            | Add all strains  $i$  of species  $l$  to the fossil record, including the corresponding parameters and population sizes

**end**

**end**

**end**

*// Propose new communities in proportion to their degradation scores and survival*

Follow Alg. 11

*// Emigration*

Draw  $N_{emi} = 5$  communities with uniform probability

**for** Each chosen community 1, ...,  $N_{emi}$  **do**

*// Find emigrating species*

$Number\_of\_emigrants = 1 + \text{Poisson}(0.5)$

    Verify that at least one species will remain

**for** Each emigrant **do**

        | Choose the emigrant at random, with priority for species that occur in more than one community

        | Remove all strains of this species from the community

**end**

**end**

*// Immigration*

Draw  $N_{immi} = 5$  communities with uniform probability

**for** Each chosen community 1, ...,  $N_{immi}$  **do**

*// Find immigrating species*

$Number\_of\_immigrants = 1 + \text{Poisson}(0.5)$

**for** Each immigrant **do**

**if** *There are species that do not feature in any community* **then**

            | Choose one of them at random

**end**

**else**

            | Choose a species that is not already in the community with uniform probability

**end**

        Take all strains of the species from the species record, add them to the offspring community

        Set the population size to  $S_0$  (approximately  $S_0$  in the IBM, see Alg. 11), in proportion to strain relative abundance

**end**

**end**

**Algorithm 10:** Implementation of the disassembly method.

**Input:** The subset of selected communities, their degradation scores  $D$ . Population sizes  $S_i$  of all strains (in the IBM,

$$S_i = p_{i0} + p_{i1}).$$

**Input:** Parameters: Number of species  $N_{spc}$  that were inoculated in the different communities. Inoculum size per species  $S_0$ .

// Scale degradation scores by species extinctions

**for** Each selected community 1, 2, ..., 7 **do**

    // Count the number of surviving species in this community

    Set the extinction counter  $E = 0$

**for** Each species  $l$  in the community **do**

**if**  $S_i = 0$  for all strains of species  $l$  **then**

            Set  $E := E + 1$

            // Re-introduce species  $l$  from the record

            Take all strains of species  $l$  from the most recent record

**end**

**end**

    // Scale the degradation score  $D$  by the fraction of surviving species

    Set  $\hat{D} := D \cdot (N_{spc} - E) / N_{spc}$

**end**

// Calculate a probability distribution based on degradation scores

Set  $p_n := \hat{D}_n / \sum_m \hat{D}_m$  for each community  $n$

// Propose new communities randomly in proportion to  $p_n$

**for** Each offspring community **do**

    Choose a parental community at random, by the probability distribution  $p_n$

**for** Each species  $l$  in the parental community **do**

        Copy the growth parameters and  $f_{ik}$  of all strains  $i$  to the offspring community

        // ODE: Set the population size of each species to  $S_0$  in total, in proportion to the relative abundance of the strains.

        // IBM: Sample approximately  $S_0$  cells with replacement as follows:

**for** Each strain  $i$  (with population  $S_i$ ) of species  $l$  (with population  $S_l$ ) **do**

            // Deactivate cells

$$p_{i0}(t_{end}) = S_i(t_{end})$$

$$p_{i1}(t_{end}) = 0$$

            // Draw new population

            Draw  $p_{i0}(t_0)$  from Poisson  $(S_0 \cdot \frac{S_i}{S_l})$

**if**  $p_{i0}(t_0) > 0$  **then**

                | Add strain  $i$  with population  $p_{i0}(t_0)$  to the new community

**end**

**end**

**end**

**end**

**Algorithm 11:** Method to propose new communities based on their degradation scores from the previous round. Called by Alg. 10
